1 **Blood flow coordinates collective endothelial cell migration during vascular plexus**  
2 **formation and promotes angiogenic sprout regression via *vegfr3/flt4***

3 Yan Chen<sup>1</sup>, Zhen Jiang<sup>2,3</sup>, Katherine H. Fisher<sup>4</sup>, Hyejeong R. Kim<sup>4</sup>, Paul C. Evans<sup>1\*</sup> and Robert N.  
4 Wilkinson<sup>5\*</sup>

5  
6 1 Department of Infection, Immunity and Cardiovascular Disease, University of Sheffield, UK

7 2 Max Planck Institute for Heart and Lung Research, Department of Developmental  
8 Genetics, Bad Nauheim 61231, Germany.

9 3 German Centre for Cardiovascular Research (DZHK), Partner Site Rhine-Main, Bad  
10 Nauheim 61231, Germany.

11 4 Department of Biomedical Science, University of Sheffield, UK

12 5 School of Life Sciences, Medical School, University of Nottingham, UK

13

14 \*Equal contribution

15

16 **Author for correspondence**

17 Robert Wilkinson

18 [rob.wilkinson@nottingham.ac.uk](mailto:rob.wilkinson@nottingham.ac.uk)

19 Phone: +44 115 823 1429

20

21 **Abstract**

22 Nascent vascular networks adapt to the increasing metabolic demands of growing tissues by expanding  
23 via angiogenesis. As vascular networks expand, blood vessels remodel, progressively refining vascular  
24 connectivity to generate a more haemodynamically efficient network. This process is driven by interplay  
25 between endothelial cell (EC) signalling and blood flow. While much is known about angiogenesis,  
26 considerably less is understood of the mechanisms underlying vessel remodelling by blood flow. Here  
27 we employ the zebrafish sub-intestinal venous plexus (SIVP) to characterise the mechanisms  
28 underlying blood flow-dependent remodelling. Using live imaging to track ECs we show that blood flow  
29 controls SIVP remodelling by coordinating collective migration of ECs within the developing plexus.  
30 Blood flow opposes continuous ventral EC migration within the SIVP and is required for regression of  
31 angiogenic sprouts to support plexus growth. Sprout regression occurs by coordinated polarisation and  
32 migration of ECs from non-perfused leading sprouts, which migrate in opposition to blood flow and  
33 incorporate into the SIV. Sprout regression is compatible with low blood flow and is dependent upon  
34 *vegfr3/flt4* function under these conditions. Blood flow limits expansive venous remodelling promoted  
35 by *vegfr3/flt4*. Collectively, these studies reveal how blood flow sculpts a developing vascular plexus by  
36 coordinating EC migration and balancing vascular remodelling via *vegfr3/flt4*.

## 37 Introduction

38 During development, all cells must obtain nutrients and excrete waste by-products at stages when  
39 organs which will eventually perform these roles have not yet formed. Therefore, developing vascular  
40 networks which perform metabolic exchange at these stages must adapt rapidly to meet the changing  
41 metabolic demands of growing tissues. As vascular networks grow, they must maximise efficiency of  
42 metabolic exchange while minimising resistance to blood delivery, thus mechanisms which promote  
43 haemodynamic efficiency have been selected throughout evolution (Campinho et al., 2020). Production  
44 of new vessels by angiogenic sprouting must be balanced with progressive network refinement by  
45 remodelling to maintain haemodynamic efficiency within a developing vascular network. This occurs  
46 either by fusion or regression of angiogenic sprouts to form tubular vessels, or by pruning redundant  
47 blood vessels (Ribatti and Crivellato, 2012). Endothelial cells (ECs) line the inner surface of blood  
48 vessels. Vascular remodelling is driven by dynamic responses of ECs to changes in their local  
49 environment (Udan et al., 2013). Most blood vessels develop from existing patent vessels with stable  
50 blood flow and while much is known about sprouting angiogenesis, the understanding of mechanisms  
51 which govern vascular remodelling and how blood flow influences them remains incomplete. For  
52 example, it is unclear whether vascular regression is induced by active signalling pathways, withdrawal  
53 of survival factors, or a combination of both, and whether this is coordinated via distinct mechanisms in  
54 different vascular beds (Korn and Augustin, 2015).

55  
56 The zebrafish sub-intestinal venous plexus (SIVP) is a vascular network which forms bilaterally in the  
57 embryo and is structurally similar to the mammalian vitelline veins which connect the embryo with  
58 extraembryonic circulation in the yolk sac (Goi and Childs, 2016). Due to its developmental plasticity  
59 the SIVP has emerged as a powerful model to characterise cellular mechanisms underlying vascular  
60 remodelling (Goi and Childs, 2016; Hen et al., 2015; Koenig et al., 2016; Lenard et al., 2015). The SIVP  
61 initially provides the developing embryo with nutrients from the yolk and later vascularises the digestive  
62 system in the larva (Isogai et al., 2001). The SIVP comprises the supra-intestinal artery (SIA), left- and  
63 right- sub-intestinal vein (SIV) located bilaterally atop the yolk and inter-connecting vessels (ICVs) which  
64 connect the SIA and SIV (Fig. 1A) and develops from angioblasts present within the ventral posterior  
65 cardinal vein, which give rise to both the SIA and the SIV (Goi and Childs, 2016; Hen et al., 2015;  
66 Koenig et al., 2016). The primitive SIVP expands bilaterally over the surface of the yolk and ECs from  
67 the primary SIV migrate dorsally throughout the plexus to form branches and the SIA (Goi and Childs,  
68 2016; Hen et al., 2015; Koenig et al., 2016). Progressive refinement of a vascular network by vessel  
69 pruning or regression involves dynamic migration and rearrangement of ECs in mammals (Franco et  
70 al., 2015, 2016; Udan et al., 2013). ECs can migrate throughout patent blood vessels within a  
71 developing vascular network (Christ et al., 1990; Franco et al., 2015), and we therefore hypothesised  
72 that coordination of EC motility is critical during vascular remodelling of the SIVP and may be regulated  
73 by blood flow.

74 Vascular Endothelial Growth Factor (VEGF) signalling controls diverse aspects of EC biology, including  
75 co-ordination of migration and survival (Akeson et al., 2010; Ferrara et al., 2003). VEGF ligands signal  
76 via their cognate receptor tyrosine kinase receptors VEGFR1-3, with VEGFR2 being the main signalling  
77 VEGFR in mammalian blood endothelial cells (Simons et al., 2016). In zebrafish, *Vegfr4/Kdr1* and  
78 *Vegfr2/Kdr* are functionally conserved with mammalian VEGFR2 (Bussmann et al., 2008). ECs sense  
79 blood flow via junctional mechanosensory complexes, the best characterised being the VE-cadherin,  
80 PECAM-1, VEGFR2/3 mechanotransducer that functions independent of VEGF ligands and is required  
81 for arterial vascular remodelling (Coon et al., 2015; Tzima et al., 2005). Levels of endothelial  
82 VEGFR3/Flt4 establish a fluid shear stress set point and sustained deviations from this initiate vascular  
83 remodelling in arteries (Baeyens et al., 2015; Tzima et al., 2005). Zebrafish *vegfaa* mutants display  
84 profound disruption of SIVP formation (Habeck et al., 2002; Koenig et al., 2016). Combined loss-of-  
85 function of the VEGF receptors *kdr1* and *kdr* disrupt SIVP formation similar to that observed in *vegfaa*  
86 mutants (Habeck et al., 2002; Koenig et al., 2016) indicating *Vegfaa* signalling via *Kdr1* and *Kdr* promote  
87 SIVP development. By contrast, *vegfc* or *flt4* mutants display no apparent defects in SIVP formation  
88 (Hogan et al., 2009a, 2009b; Le Guen et al., 2014), although *vegfc* is sufficient to induce SIVP sprouting  
89 in a similar manner to *vegfaa* (Habeck et al., 2002; Koenig et al., 2016). Co-ordination of sprout  
90 pathfinding in the SIVP is dependent upon function of a guidance receptor, PlexinD1, and plexus growth  
91 is limited by inhibition of Bone Morphogenetic Protein (BMP) signalling (Goi and Childs, 2016). SIVP  
92 remodelling is known to occur via pruning of vessel branches and fusion of collateral vessels in a flow-  
93 dependent manner (Hen et al., 2015; Lenard et al., 2015). Interestingly, retraction of SIVP leading  
94 sprouts has been observed (Hen et al., 2015), leaving an unresolved question of whether this is  
95 dependent upon blood flow. In addition, a systematic characterisation of how EC migration is  
96 coordinated within the SIVP during plexus formation is lacking and how blood flow interacts with  
97 signalling pathways to co-ordinate plexus remodelling is yet to be discovered. Here we show the critical  
98 role of blood flow in coordinating EC migration during formation of a vascular plexus. Using time-lapse  
99 imaging and analysis of EC migration, we show that blood flow co-ordinates the collective migration of  
100 ECs throughout the developing vascular network of the SIVP, promotes regression of leading  
101 angiogenic sprouts to support plexus growth and limits the diameter of veins. Our data suggest that  
102 sprout regression occurs by coordinated rearrangement of ECs between non-perfused leading sprouts  
103 and the vessel lumen, mediated by directed EC polarisation and migration against blood flow. Using  
104 erythrocyte depletion to reduce blood flow throughout the plexus, we find that reduced circulation is  
105 compatible with normal sprout regression but insufficient to restrict vessel diameter. Notably, both  
106 remodelling processes depend on *flt4* function, indicating complex control of flow-responsive  
107 remodelling by this receptor. Collectively, these studies provide a clear view of the complex cellular  
108 behaviour underlying vessel remodelling during vascular plexus formation coordinated by the response  
109 of ECs to blood flow.

## 110 **Methods**

### 111 **Zebrafish strains**

112 Maintenance of zebrafish and experimental procedures involving zebrafish were carried out according  
113 to UK national guidelines and under UK Home Office licenses. The following zebrafish lines were  
114 employed in this study: *Tg(fli1a:EGFP)<sup>y1</sup>* (Lawson and Weinstein, 2002), *Tg(gata1a:DsRed)<sup>sD2</sup>* (Traver  
115 et al., 2003), *Tg(fli1a:AC-TagRFP)<sup>SH511</sup>* (Savage et al., 2019), *Tg(kdrl:EGFP)<sup>s843</sup>* (Jin et al., 2005),  
116 *Tg(fli1a:nls-mCherry)<sup>SH550</sup>* (this study), *Tg(fli1a:nls-EGFP)<sup>SH549</sup>* (this study), *Tg(fli1a:golgi-TagRFP;*  
117 *cryaa:CFP)<sup>SH529</sup>* (this study), *flt1<sup>bns29</sup>* (Matsuoka et al., 2016).

118

### 119 **Generation of Transgenic lines**

120 *Tg(fli1a:nls-EGFP)<sup>SH549</sup>* and *Tg(fli1a:nls-mCherry)<sup>SH550</sup>* were generated using the Tol2 Kit (Kwan et al.,  
121 2007) via standard methods as previously described (Savage et al., 2019) using the following  
122 components: p5E-fli1aep (Villefranc et al., 2007), pME-mCherry or pME-EGFP, p3E-SV40pA, and  
123 pDestTol2-pA2. *Tg(fli1a:golgi-TagRFP, cryaa:cerulean)<sup>SH529</sup>* was generated by fusing amino acids 1-60  
124 of Human B4GALT1 to the N-terminus of TagRFP via *in silico* synthesis. attB1/attB2R sites were added  
125 to the fusion product by PCR (Supplementary Table 1) to generate pME-Golgi-TagRFP. The *fli1a:golgi-*  
126 *TagRFP; cryaa:CFP* construct was generated using the Tol2 Kit and the following components: p5E-  
127 *fli1aep*, pME-Golgi-TagRFP, p3E-SV40pA, and pDestTol2cryCFP. Embryos were injected at one-cell  
128 stage with 25 ng/μl *Tol2* mRNA and corresponding plasmid DNA.

129

### 130 **Microinjection of morpholinos and mRNA**

131 Microinjections were performed on single cell embryos with 1nl injection volume. Embryos were injected  
132 with 0.8ng morpholinos (Supplementary Table 1) including control, *tnnt2a* (Sehnert et al., 2002), *flt4*  
133 (Hogan et al., 2009), and *gata1a* (Galloway et al., 2005) or 200pg mRNA including *mTurquoise2* and  
134 *vegfaa<sub>165</sub>* (Lawson et al., 2002).

135

### 136 **G0 *tnnt2a* CRISPR mutants**

137 Target sequences were ordered as crRNAs (Merck) based on previously published sequences (Wu et  
138 al., 2018) (Supplementary Table 1) and co-injected alongside tracrRNA (Merck) in equimolar ratios and  
139 EnGen®Spy Cas9 NLS protein (NEB) into 1-cell zebrafish embryos.

140

### 141 **RNA *in situ* hybridisation**

142 Alkaline phosphatase wholemount *in situ* hybridisation experiments were performed using standard  
143 methods as described previously (Wilkinson et al., 2012) using probes against *mflt1* (Krueger et al.,  
144 2011), *sflt1* (Krueger et al., 2011), *flt4* (Thompson et al., 1998), *kdrl* (Fouquet et al., 1997). Detailed  
145 protocols are available upon request.

146

## 147 **Live imaging of zebrafish embryos and larvae**

148 Zebrafish were anaesthetised using Tricaine (MS-222, Sigma-Aldrich) and embedded in 1% low-  
149 melting point agarose which was held in place in a glass capillary and imaged using a light sheet Z.1  
150 microscope (Zeiss). The chamber contained E3 and tricaine (164mg/L) to ensure embryos and larvae  
151 remained anaesthetised throughout imaging. Imaging was performed at 28.5°C. Images were acquired  
152 using ZEN software (Zeiss). Zebrafish were imaged at 5-minute intervals to detect blood flow, and 10-  
153 minute intervals to track EC nuclei. To image individual erythrocytes in *gata1a* morphants, time lapses  
154 were taken at 50 frames per second for 30 seconds with 1  $\mu\text{m}$  z-stacks. The number of erythrocytes  
155 which passed a defined region of the SIV within a 30 second period were manually counted.

156

## 157 **Quantification of SIV morphology**

158 Image quantification and analysis was performed using FIJI (Schindelin et al., 2012). Parameters  
159 employed to quantify SIV morphology including area, length, vascular loops, sprout number and EC  
160 number, were recorded in a region of 5 somite widths. The length of the SIV was measured as the  
161 vertical distance from the SIA to the most ventral part of the SIV. To ensure only endothelial nuclei  
162 within the SIV were quantified, dual channel fluorescence was employed to highlight EC cytosol and  
163 nuclei. To quantify average SIV diameter, the SIV was measured at three equidistant points positioned  
164 anteroposteriorly and mean value was calculated.

165

## 166 **EC rearrangement and cell trajectory analysis**

167 *Tg(fli1a:nls-mCherry)<sup>SH550</sup>* heterozygous embryos were used for cell tracking studies. Time-lapse  
168 images were pre-processed using Linear Stack Alignment with SIFT (Lowe, 2004) in FIJI and the  
169 movements of EC nuclei were tracked using TrackMate (Tinevez et al., 2017). Any misconnected tracks  
170 were manually corrected. Tracking data was exported and analysed using customised MATLAB scripts  
171 freely available at [https://github.com/yanc0913/SIVP\\_cell\\_tracking](https://github.com/yanc0913/SIVP_cell_tracking). ECs were colour coded as tip cells  
172 (magenta), SIVP branches (orange), or SIV cells (blue) depending upon their initial position at the start  
173 of tracking (56 hpf). At the end of observation (72 hpf), cell positions were evaluated to determine  
174 whether ECs moved between EC subsets e.g., an EC initially located in the SIV which migrated to a  
175 branch by the end of tracking was recorded as a single rearrangement event. The number of ECs at  
176 initial and final position and the events of EC rearrangement were manually recorded from each time  
177 lapse. To analyse migration trajectory, a migration step was defined as one cell at position 1 ( $x_1$  and  $y_1$ )  
178 migrating to its subsequent position 2 ( $x_2$  and  $y_2$ ) in a time range (from  $t_1$  to  $t_2$ ). The distance (or  
179 displacement) of the step (or the track) was calculated as  $\sqrt{\Delta x^2 + \Delta y^2}$ . Track distance was the sum of  
180 step displacements. Migration velocity was calculated as step displacement divided by time interval,  
181 and the mean velocity at a particular time range was the average of each velocity in that range. The

182 angle of each migration step was calculated using the four-quadrant inverse tangent (*atan2*) function in  
183 MATLAB, which computed the arctangent of  $\Delta y$  and  $\Delta x$ .

184

### 185 **Quantification of EC Golgi polarity**

186 In sprout cells, the position of the Golgi at either dorsal (45-135°) or ventral (225-315°) end of the  
187 elongated EC nucleus was considered polarised. In SIV cells, the position of the Golgi at either anterior  
188 (or downstream of blood flow, 135-180°) or posterior (or upstream of blood flow, 0-45°) end of the  
189 elongated EC nucleus was considered polarised.

190

### 191 **Statistical analyses**

192 Statistical analyses and graph plots were performed using GraphPad Prism 8. All statistical analysis is  
193 described in figure legends, including paired/unpaired *t*-test, ordinary one-way ANOVA, and two-way  
194 ANOVA. All error bars display the mean and standard deviation in the figures. *p*-values, unless exact  
195 value is listed, are as follows: \*= $<0.05$ , \*\*= $\leq 0.01$ , \*\*\*= $\leq 0.001$ , \*\*\*\*= $\leq 0.0001$ .

196

## 197 **Results**

### 198 **Blood flow controls SIVP remodelling by influencing EC distribution and promoting** 199 **leading sprout regression.**

200 The SIVP develops from angiogenic sprouts which emerge from the posterior cardinal vein (PCV) by  
201 30 hpf and migrate in a ventrolateral direction, bilaterally, over the surface of the yolk (Goi and Childs,  
202 2016; Hen et al., 2015; Koenig et al., 2016). To determine the timing of SIVP development in relation  
203 to blood flow, we imaged the developing plexus in the presence of fluorescently labelled erythrocytes  
204 (Fig.1A). We find that blood flow entered the nascent SIV anteriorly from the supra-intestinal artery  
205 (SIA) between 53 hpf and 55 hpf (Fig. 1A-C"). The circulation perfused the developing SIVP from  
206 anterior to posterior and the plexus became fully perfused by 72 hpf (Fig. 1D-F", G supplementary  
207 movie 1). The SIVP undergoes extensive remodelling as the vascular network becomes perfused.  
208 Migrating angiogenic sprouts, hereafter referred to as leading sprouts, protrude from the ventral sub  
209 intestinal vein (SIV) and were observed to either undergo anastomosis with neighbouring sprouts or  
210 regress such that their constituent ECs became incorporated within the SIV by 70 hpf (Fig. 1H-J, arrows,  
211 supplementary movie 1 and 2, arrowheads).

212

213 Remodelling of leading sprouts was coincident with blood flow. In the SIVP, new sprouts are rarely  
214 produced after the onset of flow and most existing sprouts remodel via regression, therefore we  
215 considered the time after the onset of flow as the period of sprout regression. To determine whether  
216 this process was dependent upon blood flow, we inhibited cardiac contraction and circulation using a  
217 morpholino targeting cardiac troponin T type 2a (*tnnt2a*) (Sehnert et al., 2002) and examined SIVP

218 morphology (Fig. 2). The size of the SIVP was unchanged in *tnnt2a* morphants in comparison to  
219 controls, (Fig. 2A-B', C), however, SIVP morphology was altered in these larvae (Fig. 2A, B). Fewer  
220 vascular loops were present in *tnnt2a* morphants (Fig. 2A', B' asterisks, D). In addition, *tnnt2a*  
221 morphants displayed reduced dorsoventral plexus length (Fig. 1A', B', E) but increased length (Fig. 2A',  
222 B', E) and number of leading sprouts (Fig. 2A", B", E, F). While the total EC number of the SIVP was  
223 not significantly different between *tnnt2a* morphants and controls (Fig. 2G), EC distribution was altered  
224 in *tnnt2a* morphants (Fig. 2A", B", H, I). Leading sprouts contained increased numbers of ECs in *tnnt2a*  
225 morphants (Fig. 2A", B", H, I), whereas SIVP branches contained significantly fewer ECs; however, EC  
226 frequency within the ventral region of the SIVP, the sub intestinal vein (SIV), was not significantly altered  
227 (Fig. 2A", B", I). To control for potential off target effects induced by morpholino injection, we created  
228 G0 *tnnt2a* CRISPR mutants (Wu et al., 2018) and assessed SIVP morphology. Plexus morphology in  
229 mosaic *tnnt2a* CRISPR mutants was abnormal (Fig. S1A, B arrows, C-I) and phenocopied that of *tnnt2a*  
230 morphants (Fig. 2), indicating these defects were specific to inhibition of *tnnt2a* function. Collectively,  
231 this suggests that blood flow influences EC distribution throughout the developing venous plexus  
232 without altering the total number of ECs within the plexus. Moreover, the increased size and frequency  
233 of leading sprouts in *tnnt2a* morphants suggests blood flow may promote regression of these vessels.  
234 Consistent with this, leading sprouts underwent regression in the presence of blood flow and their ECs  
235 became incorporated into the SIV (Fig. 3A-C, arrows, Supplementary Movie 3). By contrast, the number  
236 of regressing sprouts was significantly reduced in *tnnt2a* morphants and larvae possessed more leading  
237 sprouts than controls by 72 hpf. Anastomosis of leading sprouts was rare and occurred independently  
238 of blood flow (Fig. 3A, asterisk, G, H, Supplementary movie 3). Taken together, these data indicate that  
239 blood flow influences SIVP remodelling in part by promoting regression of leading sprouts.

240

### 241 **Blood flow controls EC migration but not proliferation within the developing SIVP**

242 The distribution of ECs within a developing plexus could be influenced by a variety of mechanisms,  
243 including differential EC proliferation, apoptosis, or migration. While the total number of ECs within the  
244 SIVP did not alter in the absence of flow (Fig. 2G), it remained possible that the altered distribution of  
245 ECs observed could result from differential rates of proliferation/apoptosis throughout the plexus and  
246 that this may be influenced by flow. To examine whether differential EC proliferation, apoptosis, or  
247 migration contributed to the altered EC distribution of plexuses which developed in the absence of blood  
248 flow (Fig. 2I), we tracked ECs within the developing SIVP in control and *tnnt2a* morphants from 56-70  
249 hpf (Fig. 4, Supplementary Movie 4, 5). Similar numbers of ECs were tracked at the beginning of each  
250 time-lapse and ECs were grouped according to their location at 56hpf, either within SIVP branches,  
251 SIV, or tip cells within leading sprouts (Fig. 4A-B).

252

253 Endothelial proliferation was unaffected by the flow status of the developing plexus (Fig. 4C) and no  
254 apoptotic events were observed during SIVP development in either the presence or absence of blood  
255 flow. Thus, differential proliferation or apoptosis were unlikely to account for altered EC distribution  
256 observed in *tnnt2a* morphants (Fig. 2I). However, the frequency with which ECs differentially contributed  
257 to neighbouring EC subsets was altered in the absence of blood flow (Fig. 4D). In the presence of blood  
258 flow, 73% of leading sprouts consisted of a pair of endothelial tip cells positioned in parallel to each  
259 other, which is consistent with previous reports (Hen et al., 2015). When tip cells divided in the presence  
260 of blood flow (Fig. 4B), in most cases (77%), the dorsal daughter cell underwent rapid dorsal migration  
261 to contribute to the SIV (Supplementary Movie 6, arrows), leaving only the paired tip cells within the  
262 sprout and suggesting these daughter cells adopted a stalk identity (Supplementary Table 2). In rare  
263 cases in the presence of blood flow (<2%), daughter cells within sprouts which underwent dorsal  
264 migration to the SIV subsequently contributed to SIVP branches by 72 hpf (Fig. 4D). ECs were not  
265 observed to migrate into leading sprouts in the presence of blood flow, however, occasionally the  
266 nucleus of ECs at the boundary between the SIV and leading sprouts were observed to bend and  
267 transiently shuffle their position between the SIV and sprout. By contrast, only 25% of tip cells migrated  
268 dorsally to contribute to the SIV in the absence of blood flow and most tip cells remained within the  
269 leading sprout by 72 hpf. This is consistent with the observation that *tnnt2a* morphants displayed  
270 increased numbers of ECs within leading sprouts (Fig. 2B", I, S1I). However, SIV ECs were observed  
271 to migrate ventrally to contribute to leading sprouts in *tnnt2a* morphants (Fig. 4D). Interestingly, SIV  
272 cells which underwent ventral migration into sprouts in *tnnt2a* morphants were not observed to compete  
273 with the tip cells at the migration front of the sprout, suggesting these ECs did not acquire tip cell  
274 characteristics within the sprouts.

275  
276 ECs within SIVP branches comprise half of the total cell population of the SIVP but displayed only rare  
277 positional changes towards other EC subsets in the presence of blood flow, such that fewer than 1% of  
278 ECs within SIVP branches contributed to cellular rearrangement of the SIVP (Supplementary Table 2,  
279 Fig. 4D). By contrast, EC contribution to the SIV from branches was significantly increased in *tnnt2a*  
280 morphants (Fig. 4D). The total number of EC positional change events between control and *tnnt2a*  
281 morphants was not significantly different (Figure 4D), however, ECs tended to migrate more dorsally  
282 throughout the plexus in the presence of flow, whereas ventral migration of ECs was increased in those  
283 plexuses which developed without blood flow (Fig. 4D). Collectively, these data indicate that blood flow  
284 is required for directed rearrangement of ECs during SIVP development. In the presence of blood flow,  
285 ECs in the SIVP displayed distinct migratory behaviours depending upon their position. While the SIVP  
286 expanded and ECs migrated ventrally, blood flow promoted dorsal migration of ECs, presumably to  
287 support the expansion of the plexus (Fig. 4E). In contrast, in the absence of blood flow, SIVP ECs  
288 displayed persistent ventral cell movement, resulting in distended SIVP branches which contained  
289 fewer cells (Fig. 3C, F) and elongated leading sprouts with an accumulation of ECs (Fig. 4E).



290

## 291 **Blood flow co-ordinates direction of EC migration during SIVP development**

292 During cellular rearrangement within the SIVP, ECs displayed distinct migration behaviours depending  
293 upon the flow status of the plexus and their position within it (Fig. 4D). Thus, we sought to establish  
294 whether blood flow can influence the ability of ECs to migrate within the SIVP. Considering the SIVP  
295 displays a curvature approximating a semi-circle, ECs in the anterior and posterior of the SIVP migrate  
296 shorter distances than the most ventral cells in the centre of the plexus. Therefore, we tracked the most  
297 ventral ECs in each SIVP and focused on ECs within the SIV and sprouts (Fig. 5A). We examined the  
298 trajectories and migration paths of ECs within the SIV and leading sprouts (Fig. 5A) by analysing EC  
299 movement between consecutive timepoints (Fig. 5B, black arrows), hereafter referred to as migration  
300 steps. ECs close to the most ventral sprout of each SIVP were grouped into SIV ECs (blue) or tip cells  
301 (magenta) according to their initial position at 56 hpf (Fig. 5A, B) and each migration step was recorded  
302 at 30 min intervals. The total distance each cell migrated in control or *tnnt2a* morphants was not  
303 significantly different (Fig. 5C), however, the net distance travelled during each time-lapse, hereafter  
304 referred to as meandering index (distance/displacement ratio), was significantly reduced in tip cells in  
305 *tnnt2a* morphants (Fig. 5D). The closer the meandering index is to 1, the straighter the migration path  
306 of the cells and values >1 indicate increased tortuosity of migration. Thus, in *tnnt2a* morphants, tip cells  
307 showed a more directed migration path ventrally in the absence of blood flow (Fig. 5D) indicating less  
308 dorsal rearrangement towards the SIV. By contrast, the meandering index of ECs within the SIV was  
309 not significantly affected by the flow status of the plexus (Fig. 5E). Migration velocity of Tip and SIV ECs  
310 gradually reduced in the presence of blood flow, whereas in *tnnt2a* morphants, there was no significant  
311 reduction in migration velocity (Fig. 5F), indicating blood flow may act to progressively slow the  
312 migration of ECs and promote vessel stability. Spacing of EC nuclei was reduced in *tnnt2a* morphants  
313 (Fig. 5G) consistent with increased EC density in the absence of blood flow (Fig. 2B”).

314

315 The co-ordinates of tip EC migration steps fell within a 5 $\mu$ m radius in both control and *tnnt2a* morphants  
316 (Fig. 5H, I, magenta circle). Migration step co-ordinates in *tnnt2a* morphant tip ECs, were more confined  
317 along the y-axis compared to controls (Fig 5H, I magenta circle), reflecting increased crowding of ECs  
318 within sprouts (Fig. 5G) and significantly reduced dorsal but increased ventral migration (Fig. 5J). The  
319 co-ordinates of SIV EC migration steps (Fig. 5K) were similar to tip cells in the presence of flow (Fig.  
320 5H), reflecting that tip and SIV cells were in close contact and migrated collectively during SIV  
321 development. However, SIV ECs in *tnnt2a* morphants displayed a significant anterior migration bias  
322 (Fig. 5K, L, M). Taken together, these data suggest blood flow biases direction of EC migration. During  
323 SIVP development, while all ECs migrate collectively towards a ventral-anterior direction as the plexus  
324 expands, the onset of flow provides a directionality cue, biasing migration towards the posterior in SIV  
325 cells against the direction of blood flow and promoting dorsal migration of tip ECs, resulting in regression  
326 of leading sprouts and incorporation of tip ECs within the SIV (Fig. 5K). Thus, in the presence of blood

327 flow, SIV cells migrate laterally to accommodate dorsally migrating tip cells within the SIV as leading  
328 sprouts regress. By contrast, in the absence of flow, SIV ECs migrate more anteriorly, and tip cells  
329 migrate ventrally leading to elongated sprouts and failure of regression. Considering blood flows along  
330 the SIV from posterior to anterior (Fig. 1), this suggests that blood flow likely provides a horizontal force  
331 against which SIVP ECs migrate.

332

### 333 **Blood flow polarises ECs to initiate reverse migration during sprout regression**

334 During vascular development, ECs polarise during migration and in response to blood flow (Franco et  
335 al., 2015; Kwon et al., 2016). Venous ECs are often less polarised than arterial ECs (Kwon et al., 2016).  
336 Therefore, to determine whether SIVP ECs become polarised in response to flow during sprout  
337 regression, we employed transgenic lines *Tg(fli1a:nls-EGFP)<sup>SH549</sup>* and *Tg(fli1a:golgi-tagRFP,*  
338 *cryaa:CFP)<sup>SH529</sup>* to label endothelial nuclei and Golgi respectively within the SIVP (Fig. S2A-B). We  
339 imaged the SIVP in control and *tnnt2a* morphants at the onset of flow (56hpf) and during sprout  
340 regression (64 hpf) and quantified the relative position of the nuclei and Golgi located within ECs of  
341 leading sprouts and SIV.

342

343 Before the onset of blood flow, most tip cells displayed ventral Golgi positioning at the migration front  
344 with a minority polarised dorsally (Fig. S2B). The frequency of dorsal polarisation did not significantly  
345 alter in *tnnt2a* morphants (Fig. S2B). Similarly, most SIV cells were non-polarised before the onset of  
346 flow in controls and there was no significant difference in EC polarity observed in *tnnt2a* morphants  
347 (Fig. S2C). By 64 hpf, once the SIVP was perfused, the proportion of tip cells with dorsally positioned  
348 Golgi was significantly reduced in *tnnt2a* morphants. This is consistent with observations that tip cells  
349 underwent persistent ventral migration in the absence of flow, but in the presence of flow, these tended  
350 to migrate dorsally throughout the SIVP (Fig. 5J). By 64 hpf, the proportion of SIV ECs polarised  
351 upstream of flow was significantly increased in controls in comparison to *tnnt2a* morphants (Fig. S2C).  
352 These data are consistent with our cell tracking (Fig. 5) and suggest blood flow provides a directionality  
353 cue to co-ordinate EC migration within the SIVP and initiate sprout regression.

354

355 To investigate how EC rearrangement occurred during sprout regression, we labelled the endothelial  
356 actin cytoskeleton and imaged ECs in regressing sprouts using an EC-specific actin nanobody line,  
357 *Tg(fli1a:AC-TagRFP)* (Savage et al., 2019) (Fig. S3 & Supplementary Movie 7). Leading sprouts  
358 consisted of a pair of tip cells with their dorsal membranes connected with the SIV lumen (Fig. S3A-D).  
359 As sprouts regressed, both tip cells crawled over each other toward the SIV. The tip cell at the front of  
360 the sprout (Fig. S3E-H, green) reoriented its nucleus from dorsoventral to lateral orientation with most  
361 of its membrane incorporated into the perfused SIV. The neighbouring tip cell (Fig. S3I-L, pink) followed  
362 the adjacent tip cell (Fig. S3I-L, green), retracting its membrane and re-orienting its nucleus horizontally

363 once it had reached the SIV. Meanwhile the adjacent tip cell (green) held its position, possibly to  
364 maintain SIV integrity. During sprout regression, an F-actin positive focus was observed to form at the  
365 ventral membrane of the trailing tip cell (Fig. S3H). This actin focus progressed to a ring structure which  
366 increased in size and eventually closed as the tip cell membrane converged into the main vessel (Fig.  
367 S3M-P, pink), suggesting involvement of dynamic actin reorganisation during regression. Collectively,  
368 these observations indicate the dorsal membrane of sprout ECs are in contact with blood flow within  
369 the SIV lumen during regression, consistent with a role for blood flow in induction of sprout regression.  
370 Furthermore, these observations suggest delicate collaboration between neighbouring tip cells ensures  
371 sprout regression without compromising vessel integrity.

372

### 373 **Leading sprout regression occurs under conditions of reduced blood flow**

374 EC rearrangement from regions of low to high shear stress has been implicated in vessel pruning within  
375 developing blood vessels (Franco et al., 2015). Shear stress experienced by ECs relates directly to  
376 haemodynamic flow and blood viscosity and inversely to the third power of arterial radius (Heil and  
377 Schaper, 2004). Since leading sprouts within the SIVP were not perfused and because tip cells within  
378 sprouts normally migrated towards the SIV, which was perfused (Fig. 1H-J), we next investigated  
379 whether reduced blood viscosity would be compatible with normal sprout regression. Reduction of blood  
380 viscosity was achieved by titration of *gata1a* morpholino to a level which substantially reduced  
381 circulating erythrocytes by 87% on average (Fig. 6A-C, arrowheads). Unlike *tnnt2a* loss-of-function (Fig.  
382 2, S1), SIVP morphology in *gata1a* morphants was not substantially altered (Fig. 6A, B) such that ICVs  
383 remained connected with the SIA and the number of vascular loops remained unchanged (Fig. 6D).  
384 Many ICVs were not patent in *gata1a* morphants (Fig. 6B), likely due to fewer erythrocytes circulating  
385 through these vessels and this may have contributed to the reduced size of the plexus in these larvae  
386 (Fig. 6E, F). Surprisingly, there were no significant differences in the number of leading sprouts between  
387 control and *gata1a* morphants (Fig. 6G), which indicates that conditions of very low blood flow are  
388 compatible with normal sprout regression in the SIVP. In arteries, low shear stress generally induces  
389 inward remodelling as a mechanism to increase flow by constricting vessels (Silver and Vita, 2006).  
390 Surprisingly, SIV diameter was increased in *gata1a* morphants (Fig. 6F), indicating the SIV underwent  
391 expansive remodelling under conditions of reduced blood viscosity. Taken together, this suggests  
392 sprout regression can occur under conditions of reduced blood viscosity and is consistent with models  
393 which propose that the endothelial shear stress set point is low (Baeyens et al., 2015). Since SIV  
394 diameter increased in *gata1a* morphants, flow might act differently during venous remodelling than it  
395 does in arteries. We next sought to investigate whether mechanisms to sense changes in blood flow  
396 may be shared between arteries and veins.

397

## 398 **Leading sprout regression and expansive venous remodelling is dependent on *flt4*** 399 **under low blood flow conditions**

400 Zebrafish *vegfr4/kdrl* and *vegfr2/kdr* are required individually and co-operatively for normal SIV  
401 formation (Habeck et al., 2002; Koenig et al., 2016). Sustained deviations in shear stress from the set-  
402 point induce vascular remodelling in zebrafish arteries via *flt4* (Baeyens et al., 2015). In addition,  
403 VEGFR1, also known as Flt1, inhibits venous hypersprouting within the CNS (Krueger et al., 2011;  
404 Matsuoka et al., 2016; Wild et al., 2017) and may function as a VEGF decoy receptor to limit  
405 angiogenesis (Hiratsuka et al., 1998; Park et al., 1994; Zygmunt et al., 2011). Increased SIVP sprouts  
406 have been described previously in *flt1* morphants (Hen et al., 2015) and while the flow status of the  
407 SIVP was not investigated in these studies, we reasoned that flow may promote *flt1* expression in the  
408 SIVP to facilitate regression. We first examined VEGF receptor expression in the SIVP in the presence  
409 and absence of blood flow. Expression of membrane-bound *flt1* (*mflt1*) was not detectable in the SIVP  
410 in the presence or absence of flow at 56 hpf when sprouts normally begin to regress (Fig. S4A, B), or  
411 by 72 hpf as regression completes (Fig S4C, D). Similarly, soluble *flt1* (*sflt1*) was not detectable in the  
412 SIVP at 56 hpf at the onset of regression in either the presence or absence of flow (Fig. S4E, F).  
413 However, while *sflt1* was not detected in the SIVP at 72 hpf in the presence of flow, it was present in  
414 the SIVP in 40% of *tnnt2a* morphants at this stage (Fig. S4G, H, arrow), suggesting flow may negatively  
415 regulate *flt1* expression within the SIVP. Consistent with this, while expression of *sflt1* was present and  
416 unaltered in the cerebral vasculature at 56 hpf in the presence or absence of flow (Fig. S4I, J, arrows),  
417 by 72 hpf *sflt1* expression was downregulated throughout the cerebral vasculature but *sflt1* expression  
418 persisted in the cerebral vasculature of *tnnt2a* morphants (Fig. S4K, L, arrows). Since *flt1* was not  
419 expressed within the developing SIVP in the presence of blood flow this would exclude a requirement  
420 for *flt1* during leading sprout regression. Consistent with this, sprout regression was normal in *flt1*  
421 mutants (Fig. S5A-F). Collectively, this suggests *flt1* is dispensable for sprout regression.

422  
423 *Kdrl* is essential for normal SIVP formation and perfusion (Habeck et al., 2002) and *Vegfr3/Flt4* has  
424 been proposed to function as a mechanosensor which regulates the endothelial shear stress set point  
425 (Baeyens et al., 2015). Expression of both *kdrl* and *flt4* was widespread throughout the developing SIVP  
426 (Fig. S6A-L, arrows) and their expression was retained in leading sprouts which failed to regress in  
427 *tnnt2a* morphants (Fig. S6I-L, arrows). Expression of *kdrl* was unaffected by the flow status of the plexus  
428 at all stages examined (Fig. S6A, B, E, F, I, J, arrows), whereas *flt4* expression was elevated throughout  
429 the ventral SIVP at 72 hpf in *tnnt2a* morphants in comparison to controls (Fig. S6K, L, green arrows).  
430 *flt4* expression was reduced in controls which underwent normal sprout regression and was also  
431 retained in leading sprouts which failed to regress in the absence of blood flow (Fig. S6K, L arrows).  
432 Since loss of *kdrl* function precludes formation of an intact perfused SIVP (Habeck et al., 2002; Koenig  
433 et al., 2016) we instead focused on *flt4* since *flt4* loss-of-function has been shown to reduce arterial

434 caliber in zebrafish (Baeyens et al., 2015). Knockdown of *flt4* was compatible with leading sprout  
435 regression in a similar manner to *gata1a* morphants (Fig. 7A-E, arrows), however, knockdown of both  
436 *flt4* and *gata1a* induced incomplete sprout regression by 72 hpf in comparison to controls (Fig. 7D,  
437 arrows, E). Collectively, this indicates that while *flt4* is dispensable for sprout regression in the SIVP  
438 under physiological blood flow (Fig. 7C, E), its function is essential for regression of leading sprouts  
439 under low blood flow conditions (Fig. 7D, E).

440

## 441 Discussion

442 Developmental remodelling of vascular networks has been described in different models and has mainly  
443 focused on pruning of vascular cross branches (Chen et al., 2012; Franco et al., 2015; Kochhan et al.,  
444 2013; Lobov et al., 2011; Phng et al., 2009). In this context, pruning occurs in loop forming or cross  
445 branch vessel segments, which ultimately leads to regression of the cross branch, leaving behind the  
446 two parallel vessels via a process involving EC migration and apoptosis (Chen et al., 2012; Zhang et  
447 al., 2018). Dynamic EC migration and rearrangement have also been described in sprouts, however  
448 studies have mostly focused on angiogenic sprouting and anastomosis (Arima et al., 2011; Bentley et  
449 al., 2014; Jakobsson et al., 2010). Whether sprouts ultimately anastomose with each other, or not, and  
450 how these sprouts are remodelled, remained unknown. Here using the zebrafish SIVP we find most  
451 leading sprouts within the developing plexus are remodelled via EC migration-driven regression rather  
452 than anastomosis. Apoptosis during pruning has been described in murine retinal vessels when  
453 circulation is compromised (Franco et al., 2015, 2016; Hughes and Chan-Ling, 2000) and also in  
454 zebrafish cranial arteries (Kochhan et al., 2013; Zhang et al., 2018) but this has not been implicated  
455 during branch pruning within the SIVP (Lenard et al., 2015). Consistent with this, we tracked  
456 approximately 70% of SIVP ECs per plexus and while we cannot exclude the possibility that EC  
457 apoptosis occurs in the most anterior or posterior SIVP, or in the SIA, we observed no apoptotic events  
458 following live imaging of over 100 leading sprouts. Therefore, our data suggest that EC migration  
459 represents the primary mechanism of sprout regression within the SIVP. Indeed, angiogenic regression  
460 is an efficient system because cells are recycled via migration from sprouts, which are temporary  
461 structures, to other more permanent structures within developing vessels. Thus, co-ordination of EC  
462 migration represents a more efficient use of resources than sculpting vascular networks by proliferation  
463 or apoptosis.

464

465 Haemodynamic force exerted by blood flow has been proposed to be crucial in selecting and triggering  
466 pruning and regression of particular vessels (Chen et al., 2012; Franco et al., 2015; Kochhan et al.,  
467 2013; Lenard et al., 2015; Lucitti et al., 2007). Pruning mostly occurs in small and bifurcated branches  
468 with relatively unstable, or low, blood flow in comparison to adjacent large vessels (Chen et al., 2012;  
469 Lenard et al., 2015). This observation suggests that pruning is triggered by local differences in flow  
470 patterns between branches, which in turn induce EC polarisation and direct EC migration against flow,

471 from low-flow to high flow vessels (Franco et al., 2015). Our data are consistent with this and upon  
472 initiation of sprout regression within the SIVP, ECs within the non-perfused leading sprouts are likely  
473 'attracted' by the relatively high flow in the SIV, these polarise and migrate out of the regressing sprouts  
474 and subsequently contribute to the SIV. In line with this, dorsal-lateral polarisation and migration-  
475 induced EC rearrangement are highly dynamic processes during sprout regression and are dependent  
476 on blood flow. Interestingly, ventral EC migration persisted throughout the SIVP in *tnnt2a* morphants  
477 which indicates a flow-independent mechanism controls this aspect of EC migration. While blood flow  
478 co-ordinates remodelling of the SIVP during development, the plexus forms a stereotypical basket-like  
479 structure consisting of well-defined branches, SIV and leading sprouts even in the absence of flow. This  
480 suggests SIVP formation is regulated by well-orchestrated molecular patterning cues which may  
481 interact with physical forces such as blood flow to refine plexus development. Indeed, loss of guidance  
482 molecules such as PlexinD1 disrupt SIVP patterning (Goi and Childs, 2016) and PlexinD1 has recently  
483 been identified as a shear stress mechanosensor in ECs (Mehta et al., 2020), however, it is unclear  
484 whether plexinD1 modulates EC response to flow during SIVP remodelling.

485

486 Remodelling of blood vessels from a primitive structure into a more mature network at onset of flow  
487 allows temporal separation of sprouting at the migration front from pruning of branches during  
488 angiogenesis (Lenard et al., 2015). In the SIVP, new sprouts are rarely produced after the onset of flow  
489 and most existing sprouts remodel via regression. While the entire plexus expands ventrally during this  
490 period, the tip cells within leading sprouts do not simply undergo initial ventral migration followed by  
491 dorsal migration during regression, rather these ECs display transient and stochastic dorsal migration  
492 steps while undergoing collective, flow-independent, ventral migration. This suggests that sprouting and  
493 regression are interlinked. An intriguing question is at which point such steps lead to irreversible sprout  
494 regression? One possibility is when the tip cells in the sprout come into direct contact with blood flow.  
495 At the onset of flow, the posterior membrane of the tip cells are connected with adjacent SIV ECs and  
496 have limited exposure to blood flow within the SIV. It is possible that when blood flow creates sufficiently  
497 high shear forces on the SIV cells, it drives their migration against flow, and this may exert a pulling  
498 force on the tip cells which could promote their dorsal-lateral migration and induce sprout regression.  
499 The SIV cells and the tip cells in contact with flow could act as the bridging ECs to sense differences in  
500 the local flow environment, as occurs during branch pruning (Franco et al., 2015). That the combined  
501 plexus and sprout length in *tnnt2a* morphants was not significantly different to controls indicates that in  
502 the absence of blood flow, ECs within sprouts can migrate the same distance as in controls. Reduced  
503 plexus length in the absence of blood flow is therefore a consequence of increased contribution of ECs  
504 from the branches and SIV to leading sprouts. In the presence of blood flow, ECs within sprouts migrate  
505 against flow and contribute to the SIV and branches, thereby supporting their expansion or growth. This  
506 is consistent with reports that ECs incorporate in developing arterial networks in the retina and coronary  
507 vasculature via coordinated EC migration (Chang et al., 2017; Pitulescu et al., 2017). Our data therefore

508 suggest blood flow promotes regression of leading sprouts within the SIVP as a mechanism to support  
509 expansion of the developing plexus. Moreover, sprouting and regression share similar cellular  
510 behaviours but in a 'reverse mode'.

511

512 Yolk sac vascular remodelling is dependent upon erythroblast circulation (Lucitti et al., 2007) and  
513 uneven erythrocyte distribution in bifurcations has been posited to enhance local shear stress  
514 differences between vessels undergoing pruning and their neighbouring vessels (Zhou et al., 2020).  
515 Thus, blood viscosity is strongly associated with vessel regression. How ECs sense low levels of flow  
516 remains unclear, but several possible molecular mechanisms have been proposed. The level of  
517 VEGFR3 has been suggested to maintain a threshold of shear stress sensed by ECs (Baeyens et al.,  
518 2015). Interaction of the transforming growth factor  $\beta$  (TGF $\beta$ ) receptor, activin receptor like kinase  
519 ACVRL1/ALK1 with a component of the TGF $\beta$  receptor complex, Endoglin, has been reported to  
520 enhance EC sensitivity of flow sensing (Baeyens et al., 2016). In addition, non-canonical Wnt signalling  
521 may control vessel regression by modulating the threshold for flow-induced EC polarisation (Franco et  
522 al., 2016). We find that while plexus length was reduced in erythrocyte depleted embryos, even  
523 substantial reductions in blood viscosity were compatible with sprout regression. We find that sprout  
524 regression in the SIVP is dependent upon *flt4* under these reduced flow conditions, but *flt4* function is  
525 dispensable for sprout regression under normal blood flow. This indicates additional mechanisms could  
526 be involved to regulate sprout regression under normal flow conditions. Consistent with this, *flt4* mutants  
527 display normal SIVP formation (Hogan et al., 2009a, 2009b), suggesting different function of Flt4 under  
528 different flow conditions in zebrafish. The established role of VEGFR2 during EC mechanosensation  
529 (Coon et al., 2015; Tzima et al., 2005) suggests Kdr and Kdr1 are promising candidates to mediate  
530 sprout regression under normal flow, however, their requirement during SIVP formation precluded their  
531 assessment in this study. The redundant function of Flt4 during sprout regression imparts robustness  
532 on the system and facilitates proper vessel remodelling under dysregulated flow conditions. It is  
533 important to note that while SIVP leading sprouts are not perfused before or during their regression, a  
534 low level of shear provided by skimmed plasma could promote dorsal migration of tip cells to elicit  
535 regression (Zhou et al., 2020).

536

537 Conditional deletion of *Vegfr3* in mice and knockdown of *flt4* in zebrafish embryos reduced arterial  
538 lumen diameter, suggesting *flt4* promotes expansive outward remodelling of arteries in response to flow  
539 (Baeyens et al., 2015). We find that in addition to promoting sprout regression under conditions of  
540 reduced blood flow, *flt4* also promotes outward remodelling of the SIV. These results indicate that  
541 arteries and veins share common molecular mechanisms which mediate vascular remodelling in  
542 response to flow. This study raises important questions of how the mechanosensory input from altered  
543 blood flow is transduced by Flt4 to elicit the cytoskeletal changes necessary to rapidly adjust EC

544 migration. Moreover, how these mechanisms enable Flt4 to co-ordinate distinct aspects of remodelling  
545 such as promoting expansive venous remodelling while co-ordinating migration during regression  
546 require further investigation.

547

## 548 **Acknowledgements**

549 We would like to thank the aquarium staff at the University of Sheffield and University of Nottingham  
550 for excellent zebrafish husbandry. We thank Freek van Eeden for helpful discussions, Didier Stainier  
551 for providing the *flt1* mutant and Tim Chico for *tnnt2a* morpholino. This work was supported by a  
552 China Scholarship Council and University of Sheffield joint studentship to YC, JG Graves Medical  
553 Research Fellowship and Nottingham Research Fellowship to RNW, Diabetes UK (17/0005678 to  
554 RNW), BBSRC (BB/R015457/1 to RNW) and British Heart Foundation (RG/19/10/34506 to PCE).

555

## 556 **Author Contribution**

557 RNW and PCE conceived the project. YC, ZJ, KHF, HRK, PCE, RNW designed experiments; YC, ZJ,  
558 HRK performed experiments, YC, ZJ, RNW analysed data, RNW wrote the manuscript and all authors  
559 reviewed the final manuscript.

560

## 561 **Conflicts of Interest**

562 The authors declare no conflicts of interest

563

## 564 **References**

565 Akeson, A., Herman, A., Wiginton, D., and Greenberg, J. (2010). Endothelial cell activation in a  
566 VEGF-A gradient: relevance to cell fate decisions. *Microvasc. Res.* *80*, 65–74.

567 Arima, S., Nishiyama, K., Ko, T., Arima, Y., Hakozaki, Y., Sugihara, K., Koseki, H., Uchijima, Y.,  
568 Kurihara, Y., and Kurihara, H. (2011). Angiogenic morphogenesis driven by dynamic and  
569 heterogeneous collective endothelial cell movement. *Development* *138*, 4763–4776.

570 Baeyens, N., Nicoli, S., Coon, B.G., Ross, T.D., van den Dries, K., Han, J., Lauridsen, H.M., Mejean,  
571 C.O., Eichmann, A., Thomas, J.-L., et al. (2015). Vascular remodeling is governed by a VEGFR3-  
572 dependent fluid shear stress set point. *Elife* *4*.

573 Baeyens, N., Larrivé, B., Ola, R., Hayward-Piatkowskyi, B., Dubrac, A., Huang, B., Ross, T.D.,  
574 Coon, B.G., Min, E., Tsarfati, M., et al. (2016). Defective fluid shear stress mechanotransduction  
575 mediates hereditary hemorrhagic telangiectasia. *J. Cell Biol.* *214*, 807–816.

576 Bentley, K., Franco, C.A., Philippides, A., Blanco, R., Dierkes, M., Gebala, V., Stanchi, F., Jones, M.,  
577 Aspalter, I.M., Cagna, G., et al. (2014). The role of differential VE-cadherin dynamics in cell  
578 rearrangement during angiogenesis. *Nat. Cell Biol.* 1–15.

579 Bussmann, J., Lawson, N., Zon, L., Schulte-Merker, S., and Committee, Z. N. (2008). Zebrafish VEGF  
580 receptors: a guideline to nomenclature. *PLoS Genet.* *4*, e1000064.

581 Campinho, P., Vilfan, A., and Vermot, J. (2020). Blood Flow Forces in Shaping the Vascular System:  
582 A Focus on Endothelial Cell Behavior. *Front. Physiol.* *11*, 552.



- 583 Chang, A.H., Raftrey, B.C., D'Amato, G., Surya, V.N., Poduri, A., Chen, H.I., Goldstone, A.B., Woo,  
584 J., Fuller, G.G., Dunn, A.R., et al. (2017). DACH1 stimulates shear stress-guided endothelial cell  
585 migration and coronary artery growth through the CXCL12-CXCR4 signaling axis. *Genes Dev.* *31*,  
586 1308–1324.
- 587 Chen, Q., Jiang, L., Li, C., Hu, D., Bu, J., Cai, D., and Jiu-lin (2012). Haemodynamics-driven  
588 developmental pruning of brain vasculature in zebrafish. *PLoS Biol.* *10*, e1001374.
- 589 Christ, B., Poelmann, R.E., Mentink, M.M., and Gittenberger-de Groot, A.C. (1990). Vascular  
590 endothelial cells migrate centripetally within embryonic arteries. *Anat. Embryol.* *181*, 333–339.
- 591 Coon, B.G., Baeyens, N., Han, J., Budatha, M., Ross, T.D., Fang, J.S., Yun, S., Thomas, J.-L., and  
592 Schwartz, M.A. (2015). Intramembrane binding of VE-cadherin to VEGFR2 and VEGFR3 assembles  
593 the endothelial mechanosensory complex. *J. Cell Biol.* *208*, 975–986.
- 594 Ferrara, N., Gerber, H., and LeCouter, J. (2003). The biology of VEGF and its receptors. *Nat. Med.* *9*,  
595 669–676.
- 596 Fouquet, B., Weinstein, B.M., Serluca, F.C., and Fishman, M.C. (1997). Vessel patterning in the  
597 embryo of the zebrafish: guidance by notochord. *Dev. Biol.* *183*, 37–48.
- 598 Franco, C.A., Jones, M.L., Bernabeu, M.O., Geudens, I., Mathivet, T., Rosa, A., Lopes, F.M., Lima,  
599 A.P., Ragab, A., Collins, R., et al. (2015). Dynamic endothelial cell rearrangements drive  
600 developmental vessel regression. *PLoS Biol.* *13*, e1002125.
- 601 Franco, C.A., Jones, M.L., Bernabeu, M.O., Vion, A.-C., Barbacena, P., Fan, J., Mathivet, T.,  
602 Fonseca, C.G., Ragab, A., Yamaguchi, T.P., et al. (2016). Non-canonical Wnt signalling modulates  
603 the endothelial shear stress flow sensor in vascular remodelling. *Elife* *5*.
- 604 Galloway, J.L., Wingert, R.A., Thisse, C., Thisse, B., and Zon, L.I. (2005). Loss of *gata1* but not *gata2*  
605 converts erythropoiesis to myelopoiesis in zebrafish embryos. *Dev. Cell* *8*, 109–116.
- 606 Goi, M., and Childs, S. (2016). Patterning Mechanisms of the Sub-Intestinal Venous Plexus in  
607 Zebrafish. *Dev. Biol.* *409*, 114–128.
- 608 Habeck, H., Odenthal, J., Walderich, B., Maischein, H.-M., and Schulte-Merker, S. (2002). Analysis of  
609 a Zebrafish VEGF Receptor Mutant Reveals Specific Disruption of Angiogenesis. *Curr. Biol.* *12*, 1405-  
610 1412.
- 611 Heil, M., and Schaper, W. (2004). Influence of mechanical, cellular, and molecular factors on  
612 collateral artery growth (arteriogenesis). *Circ. Res.* *95*, 449–458.
- 613 Hen, G., Nicenboim, J., Mayseless, O., Asaf, L., Shin, M., Busolin, G., Hofi, R., Almog, G., Tiso, N.,  
614 Lawson, N.D., et al. (2015). Venous-derived angioblasts generate organ-specific vessels during  
615 zebrafish embryonic development. *Development* *142*, 4266–4278.
- 616 Hiratsuka, S., Minowa, O., Kuno, J., Noda, T., and Shibuya, M. (1998). Flt-1 lacking the tyrosine  
617 kinase domain is sufficient for normal development and angiogenesis in mice. *Proc. Natl. Acad. Sci.*  
618 *U. S. A.* *95*, 9349–9354.
- 619 Hogan, B.M., Bos, F.L., Bussmann, J., Witte, M., Chi, N.C., Duckers, H.J., and Schulte-Merker, S.  
620 (2009a). *Ccbe1* is required for embryonic lymphangiogenesis and venous sprouting. *Nat. Genet.* *41*,  
621 396–398.
- 622 Hogan, B.M., Herpers, R., Witte, M., Heloterä, H., Alitalo, K., Duckers, H., and Schulte-Merker, S.  
623 (2009b). *Vegfc/Flt4* signalling is suppressed by *Dll4* in developing zebrafish intersegmental arteries.  
624 *Development* *136*, 4001–4009.

- 625 Hughes, S., and Chan-Ling, T. (2000). Roles of endothelial cell migration and apoptosis in vascular  
626 remodeling during development of the central nervous system. *Microcirculation* 7, 317–333.
- 627 Isogai, S., Horiguchi, M., and Weinstein, B.M. (2001). The vascular anatomy of the developing  
628 zebrafish: an atlas of embryonic and early larval development. *Dev. Biol.* 230, 278–301.
- 629 Jakobsson, L., Franco, C.A., Bentley, K., Collins, R., Ponsioen, B., Aspalter, I.M., Rosewell, I., Busse,  
630 M., Thurston, G., Alex, et al. (2010). Endothelial cells dynamically compete for the tip cell position  
631 during angiogenic sprouting. *Nat. Cell Biol.* 12, 943–953. Kochhan, E., Lenard, A., Ellertsdottir, E.,  
632 Herwig, L., Affolter, M., Belting, H.-G., and Siekmann, A.F. (2013). Blood Flow Changes Coincide with  
633 Cellular Rearrangements during Blood Vessel Pruning in Zebrafish Embryos. *PLoS One* 8, e75060.
- 634 Koenig, A.L., Baltrunaite, K., Bower, N.I., Rossi, A., Stainier, D., Hogan, B.M., and Sumanas, S.  
635 (2016). Vegfa signaling promotes zebrafish intestinal vasculature development through endothelial  
636 cell migration from the posterior cardinal vein. *Dev. Biol.*
- 637 Korn, C., and Augustin, H.G. (2015). Mechanisms of Vessel Pruning and Regression. *Dev. Cell* 34, 5–  
638 17.
- 639 Krueger, J., Liu, D., Scholz, K., Zimmer, A., Shi, Y., Klein, C., Siekmann, A., Schulte-Merker, S.,  
640 Cudmore, M., Ahmed, A., et al. (2011). Flt1 acts as a negative regulator of tip cell formation and  
641 branching morphogenesis in the zebrafish embryo. *Development* 138, 2111–2120.
- 642 Kwan, K.M., Fujimoto, E., Grabher, C., Mangum, B.D., Hardy, M.E., Campbell, D.S., Parant, J.M.,  
643 Yost, H.J., Kanki, J.P., and Chien, C. (2007). The Tol2kit: a multisite gateway-based construction kit  
644 for Tol2 transposon transgenesis constructs. *Dev. Dyn.* 236, 3088–3099.
- 645 Kwon, H.-B., Wang, S., Helker, C., Rasouli, S.J., Maischein, H.-M., Offermanns, S., Herzog, W., and  
646 Stainier, D. (2016). In vivo modulation of endothelial polarization by Apelin receptor signalling. *Nat.*  
647 *Commun.* 7, 11805.
- 648 Jin, S.-W., Beis, D., Mitchell, T., Chen, J.-N., and Stainier, D. (2005). Cellular and molecular analyses  
649 of vascular tube and lumen formation in zebrafish. *Development* 132, 5199–5209.
- 650 Lawson, N.D., Vogel, A.M., and Weinstein, B.M. (2002). sonic hedgehog and vascular endothelial  
651 growth factor act upstream of the Notch pathway during arterial endothelial differentiation. *Dev. Cell* 3,  
652 127–136.
- 653 Lenard, A., Daetwyler, S., Betz, C., Ellertsdottir, E., Belting, H.-G., Huisken, J., and Affolter, M.  
654 (2015). Endothelial Cell Self-fusion during Vascular Pruning. *PLoS Biol.* 13, e1002126.
- 655 Le Guen, L., Karpanen, T., Schulte, D., Harris, N.C., Koltowska, K., Roukens, G., Bower, N.I., van  
656 Impel, A., Stacker, S.A., Achen, M.G., et al. (2014). Ccbe1 regulates Vegfc-mediated induction of  
657 Vegfr3 signaling during embryonic lymphangiogenesis. *Development* 1–11.
- 658 Lobov, I.B., Cheung, E., Wudali, R., Cao, J., Halasz, G., Wei, Y., Economides, A., Lin, H.C.,  
659 Papadopoulos, N., Yancopoulos, G.D., et al. (2011). The Dll4/Notch pathway controls postangiogenic  
660 blood vessel remodeling and regression by modulating vasoconstriction and blood flow. *Blood* 117,  
661 6728–6737.
- 662 Lowe, D.G. (2004). Distinctive image features from scale-invariant keypoints. *Int. J. Comput. Vis.* 60,  
663 91–110.
- 664 Lucitti, J.L., Jones, E.A.V., Huang, C., Chen, J., Fraser, S.E., and Dickinson, M.E. (2007). Vascular  
665 remodeling of the mouse yolk sac requires hemodynamic force. *Development* 134, 3317–3326.

- 666 Matsuoka, R.L., Marass, M., Avdesh, A., Helker, C.S., Maischein, H.-M., Grosse, A.S., Kaur, H.,  
667 Lawson, N.D., Herzog, W., and Stainier, D.Y. (2016). Radial glia regulate vascular patterning around  
668 the developing spinal cord. *Elife* 5.
- 669 Mehta, V., Pang, K.-L., Rozbesky, D., Nather, K., Keen, A., Lachowski, D., Kong, Y., Karia, D.,  
670 Ameismeier, M., Huang, J., et al. (2020). The guidance receptor plexin D1 is a mechanosensor in  
671 endothelial cells. *Nature*.
- 672 Park, J.E., Chen, H.H., Winer, J., Houck, K.A., and Ferrara, N. (1994). Placenta growth factor.  
673 Potentiation of vascular endothelial growth factor bioactivity, in vitro and in vivo, and high affinity  
674 binding to Flt-1 but not to Flk-1/KDR. *J. Biol. Chem.* 269, 25646–25654.
- 675 Phng, L., Potente, M., Leslie, J.D., Babbage, J., Nyqvist, D., Lobov, I., Ondr, J.K., Rao, S., Lang, R.A.,  
676 Thurston, G., et al. (2009). Nrp coordinates endothelial Notch and Wnt signaling to control vessel  
677 density in angiogenesis. *Dev. Cell* 16, 70–82.
- 678 Pitulescu, M.E., Schmidt, I., Giaimo, B.D., Antoine, T., Berkenfeld, F., Ferrante, F., Park, H., Ehling,  
679 M., Biljes, D., Rocha, S.F., et al. (2017). Dll4 and Notch signalling couples sprouting angiogenesis  
680 and artery formation. *Nat. Cell Biol.* 19, 915–927.
- 681 Ribatti, D., and Crivellato, E. (2012). ‘Sprouting angiogenesis’, a reappraisal. *Dev. Biol.* 372, 157–165.
- 682 Schindelin, J., Arganda-Carreras, I., Frise, E., Kaynig, V., Longair, M., Pietzsch, T., Preibisch, S.,  
683 Rueden, C., Saalfeld, S., Schmid, B., et al. (2012). Fiji: an open-source platform for biological-image  
684 analysis. *Nat. Methods* 9, 676–682.
- 685 Sehnert, A.J., Huq, A., Weinstein, B.M., Walker, C., Fishman, M., Stainier, D.Y.R. (2002). Cardiac  
686 troponin T is essential in sarcomere assembly and cardiac contractility. *Nat. Genet.* 31, 106–110.
- 687 Silver, A.E., and Vita, J.A. (2006). Shear-stress-mediated arterial remodeling in atherosclerosis: too  
688 much of a good thing? *Circulation* 113, 2787–2789.
- 689 Simons, M., Gordon, E., and Claesson-Welsh, L. (2016). Mechanisms and regulation of endothelial  
690 VEGF receptor signalling. *Nat. Rev. Mol. Cell Biol.* 17, 611–625.
- 691 Tinevez, J.-Y., Perry, N., Schindelin, J., Hoopes, G.M., Reynolds, G.D., Laplantine, E., Bednarek,  
692 S.Y., Shorte, S.L., and Eliceiri, K.W. (2017). TrackMate: An open and extensible platform for single-  
693 particle tracking. *Methods* 115, 80–90.
- 694 Tzima, E., Irani-Tehrani, M., Kiosses, W.B., Dejana, E., Schultz, D.A., Engelhardt, B., Cao, G.,  
695 DeLisser, H., and Schwartz, M.A. (2005). A mechanosensory complex that mediates the endothelial  
696 cell response to fluid shear stress. *Nature* 437, 426–431.
- 697 Udan, R.S., Vadakkan, T.J., and Dickinson, M.E. (2013). Dynamic responses of endothelial cells to  
698 changes in blood flow during vascular remodeling of the mouse yolk sac. *Development* 140, 4041–  
699 4050.
- 700 Villefranc, J., Amigo, J., Lawson, N. (2007). Gateway compatible vectors for analysis of gene function  
701 in the zebrafish. *Dev. Dyn.* 236, 3077-3087.
- 702 Wild, R., Klems, A., Takamiya, M., Hayashi, Y., Strähle, U., Ando, K., Mochizuki, N., van Impel, A.,  
703 Schulte-Merker, S., Krueger, J., et al. (2017). Neuronal sFlt1 and Vegfaa determine venous sprouting  
704 and spinal cord vascularization. *Nat. Commun.* 8, 13991.

- 705 Wilkinson, R.N., Koudijs, M.J., Patient, R.K., Ingham, P.W., Schulte-Merker, S., Van Eeden,  
706 F.J.M. (2012). Hedgehog signaling via a calcitonin receptor-like receptor can induce arterial  
707 differentiation independently of VEGF signaling in zebrafish. *Blood* 120, 477–488.
- 708 Wu, R.S., Duong, D.N., Lam, I.I., Clay, H., Coughlin, S.R., and Deo, R.C. (2018). A Rapid Method for  
709 Directed Gene Knockout for Screening in G0 Zebrafish. *Dev. Cell* 46, 112-125.e4.
- 710 Zhang, Y., Xu, B., Chen, Q., Yan, Y., Du, J., and Du, X. (2018). Apoptosis of Endothelial Cells  
711 Contributes to Brain Vessel Pruning of Zebrafish During Development. *Front. Mol. Neurosci.* 11, 222.
- 712 Zhou, Q., Perovic, T., Fechner, I., Edgar, L.T., Hoskins, P.R., Gerhardt, H., Krüger, T., and Bernabeu,  
713 M.O. (2020). Association between erythrocyte dynamics and vessel remodelling in developmental  
714 vascular networks (bioRxiv).
- 715 Zygmunt, T., Gay, C.M., Blondelle, J., Singh, M.K., Flaherty, K.M., Means, P.C., Herwig, L., Krudewig,  
716 A., Belting, H., Affolter, M., et al. (2011). Semaphorin-PlexinD1 Signaling Limits Angiogenic Potential  
717 via the VEGF Decoy Receptor sFlt1. *Dev. Cell* 21, 301–314.
- 718

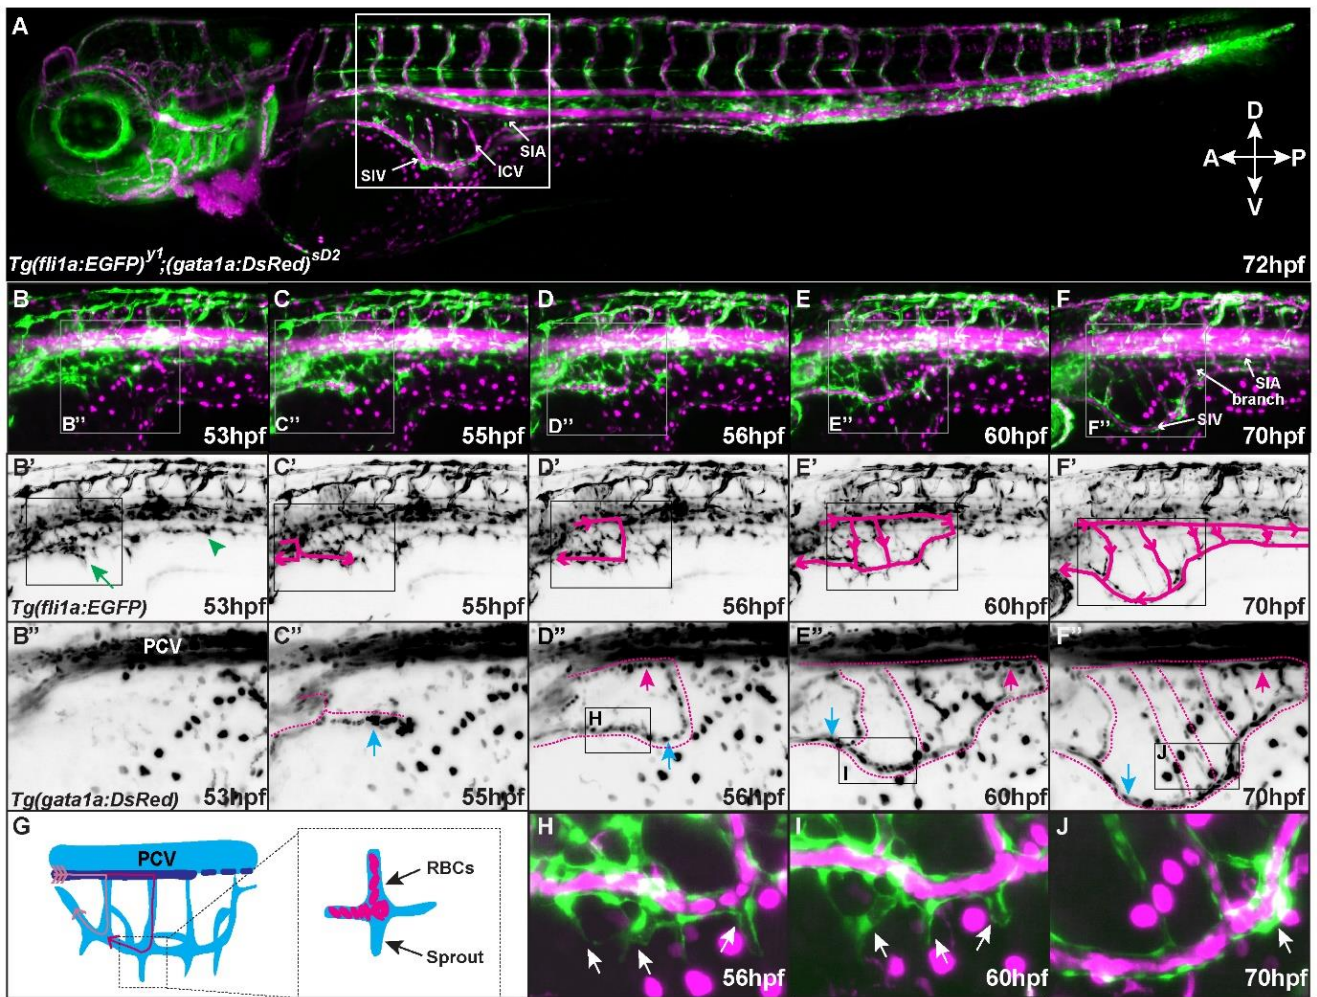

719  
720

721

### Figure 1 SIVP perfusion is coincident with leading sprout regression

722

(A-F) Representative images taken from a time-lapse (Supplementary Movie 1) between 53-70hpf showing perfusion of the sub-intestinal venous plexus (SIVP). *Tg(fli1a:EGFP)<sup>y1</sup>* was used to label endothelial cells (green) and *Tg(gata1a:DsRed)<sup>sD2</sup>* labels erythrocytes (magenta). Region highlighted in A is displayed in B-F, and region highlighted in B-F is enlarged in B'-F'. Region highlighted in B'-F' is enlarged in B''-F'' and displays the path of circulating erythrocytes. Circulation enters the anterior SIVP between 53hpf (B-B'') and 55hpf (C-C'') and perfuses the SIV from anterior to posterior as it develops (D-F''). Blood enters the SIVP from the supra-intestinal artery (SIA) (D'-F'', magenta arrows) an extension of the upstream anterior mesenteric artery, through the SIVP branches, drains into the SIV (C''-F'', blue arrows) and exits the SIV via the hepatic portal vein (HPV). **G**) Schematic representation of SIVP perfusion. **H-J**) Leading sprouts are observed to regress and undergo anastomosis in the presence of blood flow (arrows). ICV, inter-connecting vessel; PCV, posterior cardinal vein; RBC, red blood cells; SIA, supra-intestinal artery; SIV, sub-intestinal vein.

733

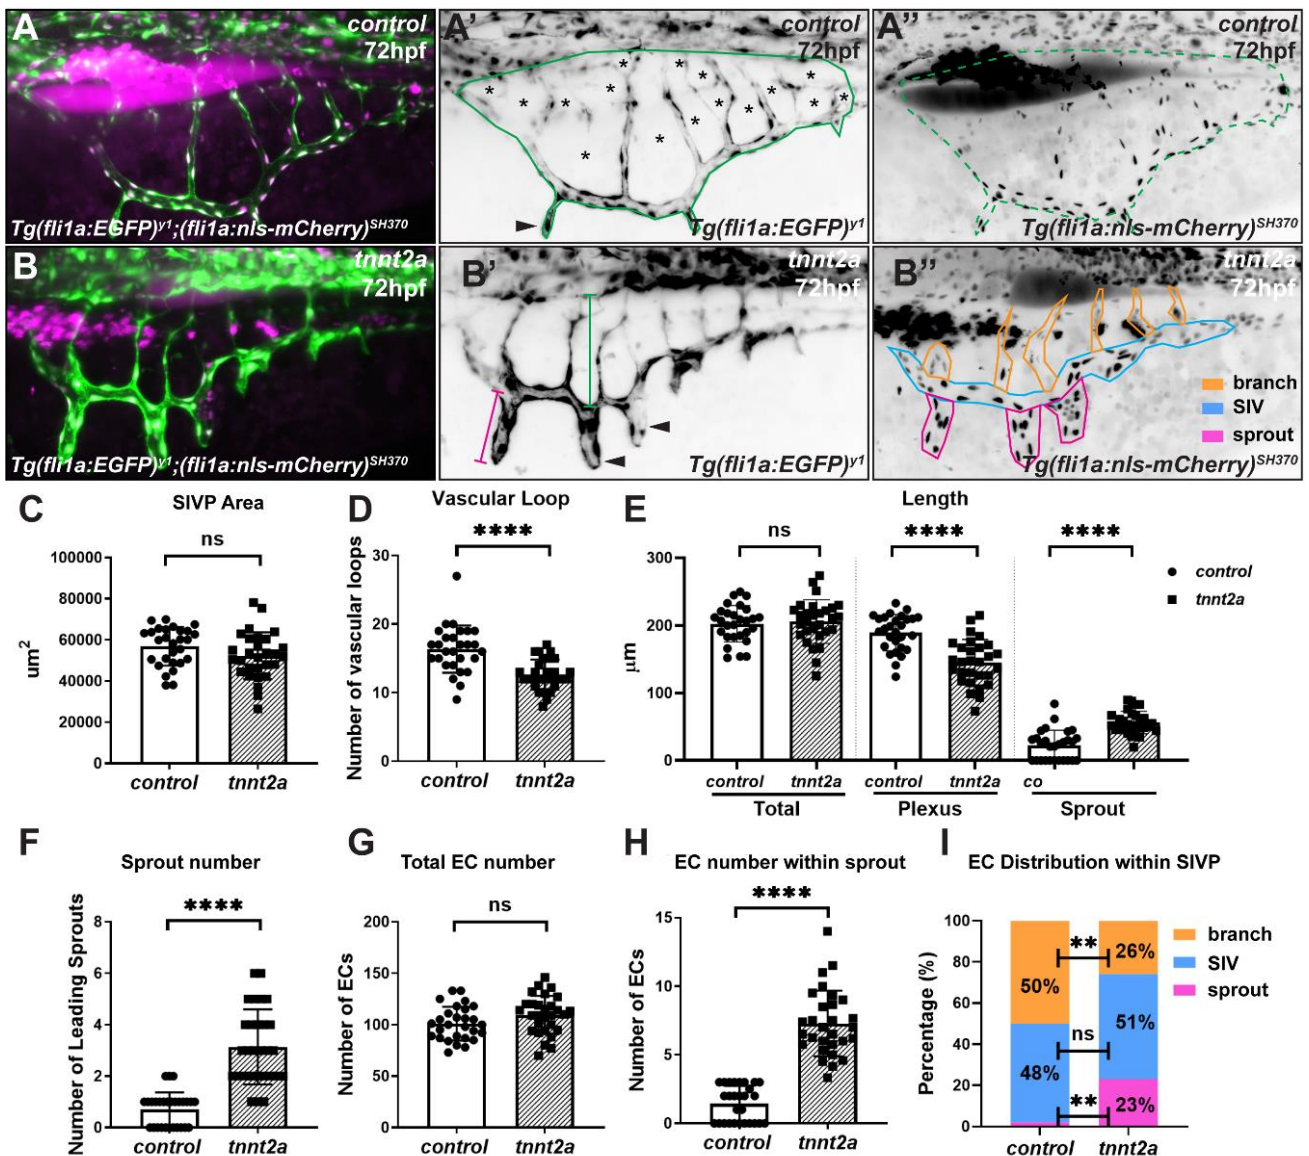

734  
735

736

737

738

739

740

741

742

743

744

745

746

747

748

749

## Figure 2 Blood flow controls morphology and endothelial cell distribution of the SIVP

**A, B**) Comparison of SIVP morphology at 72hpf in the presence (control morphants, **A**) or absence of blood flow (*tnnt2a* morphants, **B**). **B**) No significant difference in plexus area (highlighted in green in **A'**, **A''**) was observed in the presence or absence of blood flow (**C**). Embryos without blood flow displayed fewer vascular loops (**A'**, asterisks, **D**). Total length of the SIVP plexus was not altered in the presence or absence of blood flow (**B'**, green line, **E**), however *tnnt2a* morphant embryos displayed reduced length of the SIVP basket (**B'**, blue line, **E**) and increased sprout length (**B'**, magenta line, **E**). The number of leading sprouts (**A'**, **B'** arrowheads) were increased in *tnnt2a* morphant embryos (**B''**, highlighted in magenta, **F**). The total number of ECs in the SIV was not altered by the flow status of the plexus (**G**), however, leading sprouts contained increased numbers of ECs in *tnnt2a* morphant embryos (**B''**, highlighted in magenta, **H**). In the absence of blood flow, SIV branches contained fewer ECs (**B''**, highlighted in orange, **I**). Unpaired *t*-test, \*\*\*\*  $p \leq 0.0001$ , ns;  $p \geq 0.05$ , control embryos,  $n=28$ ; *tnnt2a* embryos,  $n=29$ .

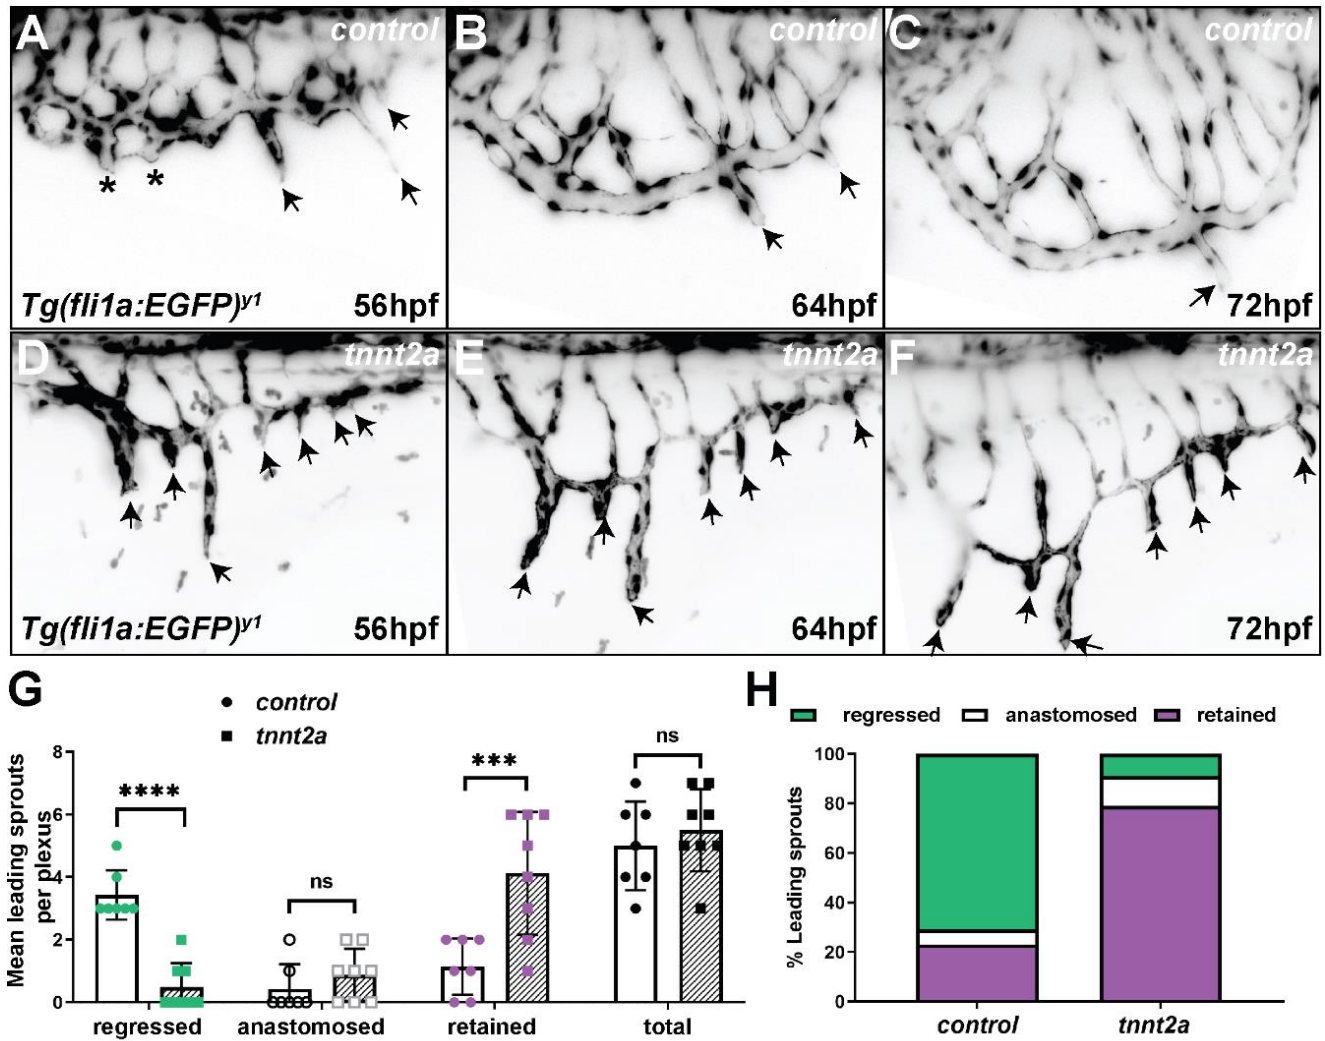

750  
751  
752  
753  
754  
755  
756  
757  
758  
759  
760  
761  
762  
763  
764  
765

### Figure 3 Blood flow promotes regression of SIVP leading sprouts

**A-F** SIVP development 56-72hpf in the presence and absence of flow. Still images taken from time lapse movies (Supplementary Movie 3). **A**) In control animals, before blood flow enters the plexus, some angiogenic sprouts from the primary SIV anastomose (asterisks) to form vascular loops, while others lead at the migration front (arrows). **B, C**) In controls, leading sprouts regressed following the onset of blood flow and sprout ECs became incorporated into the SIV (arrows). **D-F**) In the absence of flow, leading sprouts failed to regress (**D-F**, arrows). **G, H**) Leading sprout regression was significantly reduced in *tnnt2a* morphant embryos and thus, the number of sprouts present at 72hpf were increased in comparison to controls. Unpaired *t*-test \*\*\*\*  $p \leq 0.0001$ ; \*\*\*  $p \leq 0.001$ ; ns  $p \geq 0.05$ ; control morphants  $n=8$ ; *tnnt2a* morphants  $n=7$ .

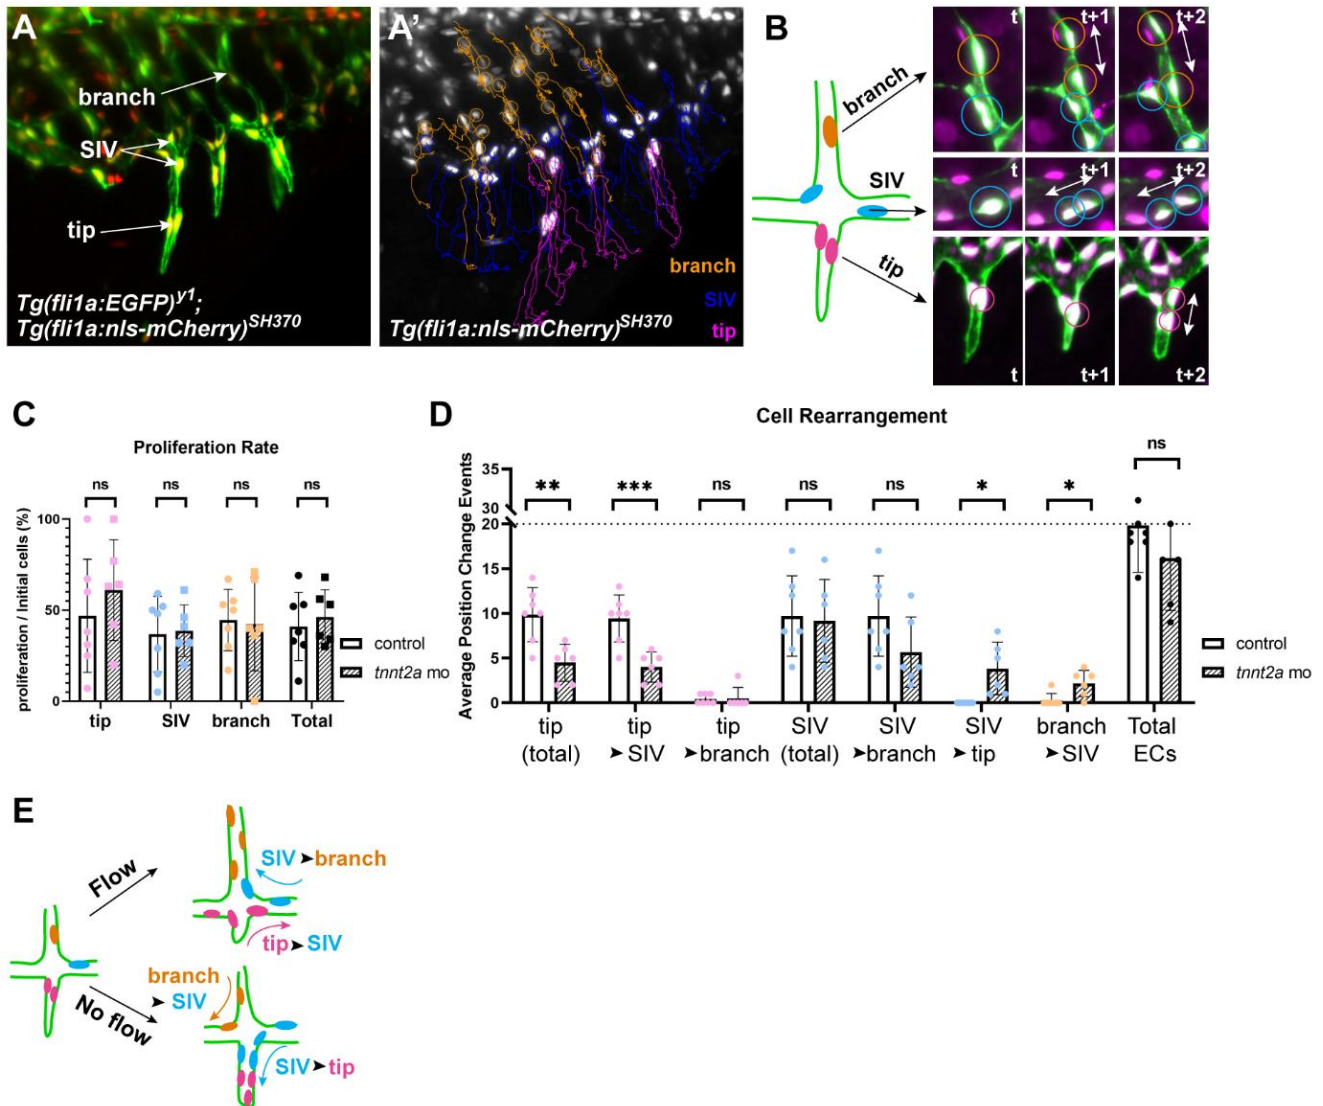

766

767

768

**Figure 4 Blood flow coordinates EC migration but not proliferation within the developing SIVP**

769

770

771

772

773

774

775

776

777

778

779

780

**A-B)** ECs in the SIVP were divided into three groups depending upon their initial position at 56hpf. SIVP branch cells (orange) within branches, SIV cells (magenta) within the ventral SIV (blue) and tip cells within leading sprouts (magenta). Examples of EC proliferation in subsequent timepoints are highlighted (**B**). The direction of cell division is parallel to the long axis of the vessel (**B**). **C)** EC proliferation rate (cell division events/initial number of ECs) did not differ in total or between groups in the presence or absence of flow. **D)** There was a substantial reduction in tip cell contribution to SIV in *tnnt2a* morphants, indicating that flow is required for dorsal tip cell rearrangement. In addition, there was an increase in ventral migration of SIV ECs into leading sprouts in the absence of flow. Most branch cells remained in the branches under flow, however, more branch ECs migrated ventrally to contribute to the SIV without blood flow. **E)** Schematic representation of differing EC migration in the presence and absence of blood flow. Unpaired *t*-test \*\*\* $p \leq 0.001$ ; \*\* $p \leq 0.01$ ; \* $p < 0.05$ ; ns  $p \geq 0.05$ , control morphants  $n=7$ ; *tnnt2a* morphants  $n=6$ .

781



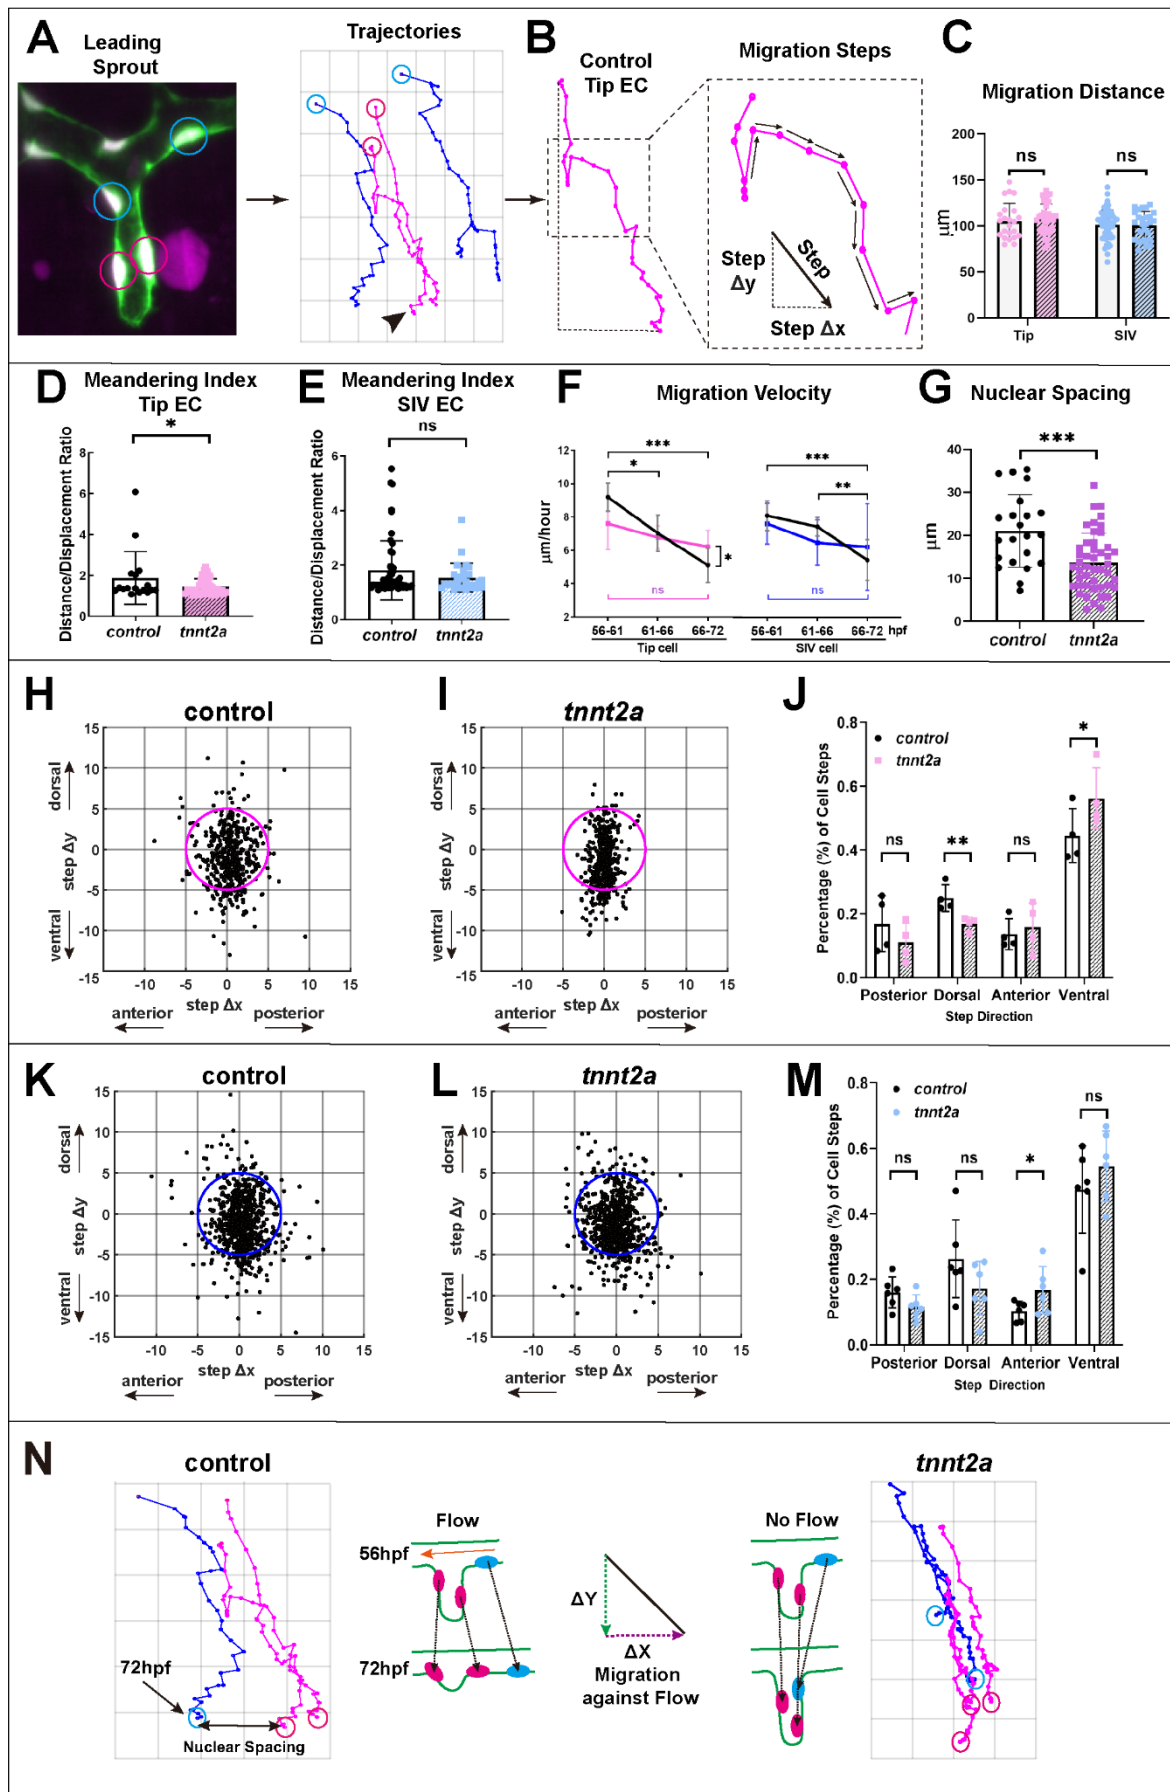

783 **Figure 5 Blood flow controls EC migration direction during leading sprout regression**  
784 **A)** Examples of ECs within the SIV (blue) or tip cells (magenta) tracked in proximity to leading sprout  
785 and example migration trajectories. **B)** Migration ‘steps’ are defined as the movement of ECs between  
786 two consecutive time points (arrows). **C)** Migration distance (the sum of step displacements) of SIV ECs  
787 or tip cells was unaffected by flow status of SIVP. **(C-E)** Each dot represents a migration track of a  
788 single EC. control, n=79 tracks from 5 embryos; *tnnt2a*, n=64 tracks from 5 embryos. Tip cells: control,  
789 n=23 tracks, *tnnt2a*, n=37 tracks; SIV cells, control, n=56 tracks, *tnnt2a*, n=27 tracks; Unpaired *t*-test **D,**  
790 **E)** Meandering index was significantly reduced in tip cells in *tnnt2a* morphants **(D)** but was not  
791 significantly different in SIV ECs **(E)**. **F)** Migration velocity of tip or SIV cells gradually reduced in the  
792 presence of flow (black lines) but was not significantly altered in *tnnt2a* morphants (coloured lines).  
793 Average speed of every step of tip cells or SIV cells from 6 control or *tnnt2a* embryos. Unpaired *t*-test.  
794 **G)** Nuclear spacing was significantly reduced in *tnnt2a* morphants indicating increased EC crowding  
795 within the SIVP. Control, n=22 from 6 embryos; *tnnt2a*, n=46 from 6 embryos. Unpaired *t*-test **H-J)**  
796 Scatter plots displaying coordinates of tip cell migration steps. The magenta circle in each plot (5µm  
797 radius) is outlined as a reference for coordinate distribution. Migration steps show increased alignment  
798 along Y-axis in *tnnt2a* mutants **(I)** in comparison to controls **(H)** and tip cells display significant reduction  
799 in dorsal and increase in ventral migration in the absence of blood flow **(J)**. control, n=383 steps from 4  
800 embryos; *tnnt2a*, n=860 steps from 4 embryos. **K-M)** Scatter plots displaying coordinates of SIV EC  
801 migration steps indicate increased migration steps in quadrant III in *tnnt2a* morphants **(L)** indicating  
802 anterior migration bias in the absence of blood flow **(M)**. control, n=1313 steps from 6 embryos; *tnnt2a*,  
803 n=744 steps from 6 embryos. **N)** Schematic representation of EC migration within the SIVP during  
804 sprout regression. In the presence of flow, SIV cells migrate laterally to accommodate dorsally migrating  
805 tip cells as leading sprouts regress. In the absence of flow, SIV ECs migrate more anteriorly, and tip  
806 cells migrate ventrally leading to elongated sprouts and regression failure. \*\*\*\*  $p \leq 0.0001$ ; \*\*\*  $p \leq 0.001$ ;  
807 \*\*  $p \leq 0.01$ ; \*  $p < 0.05$ ; ns  $p \geq 0.05$ .

808  
809  
810  
811  
812  
813  
814  
815

816

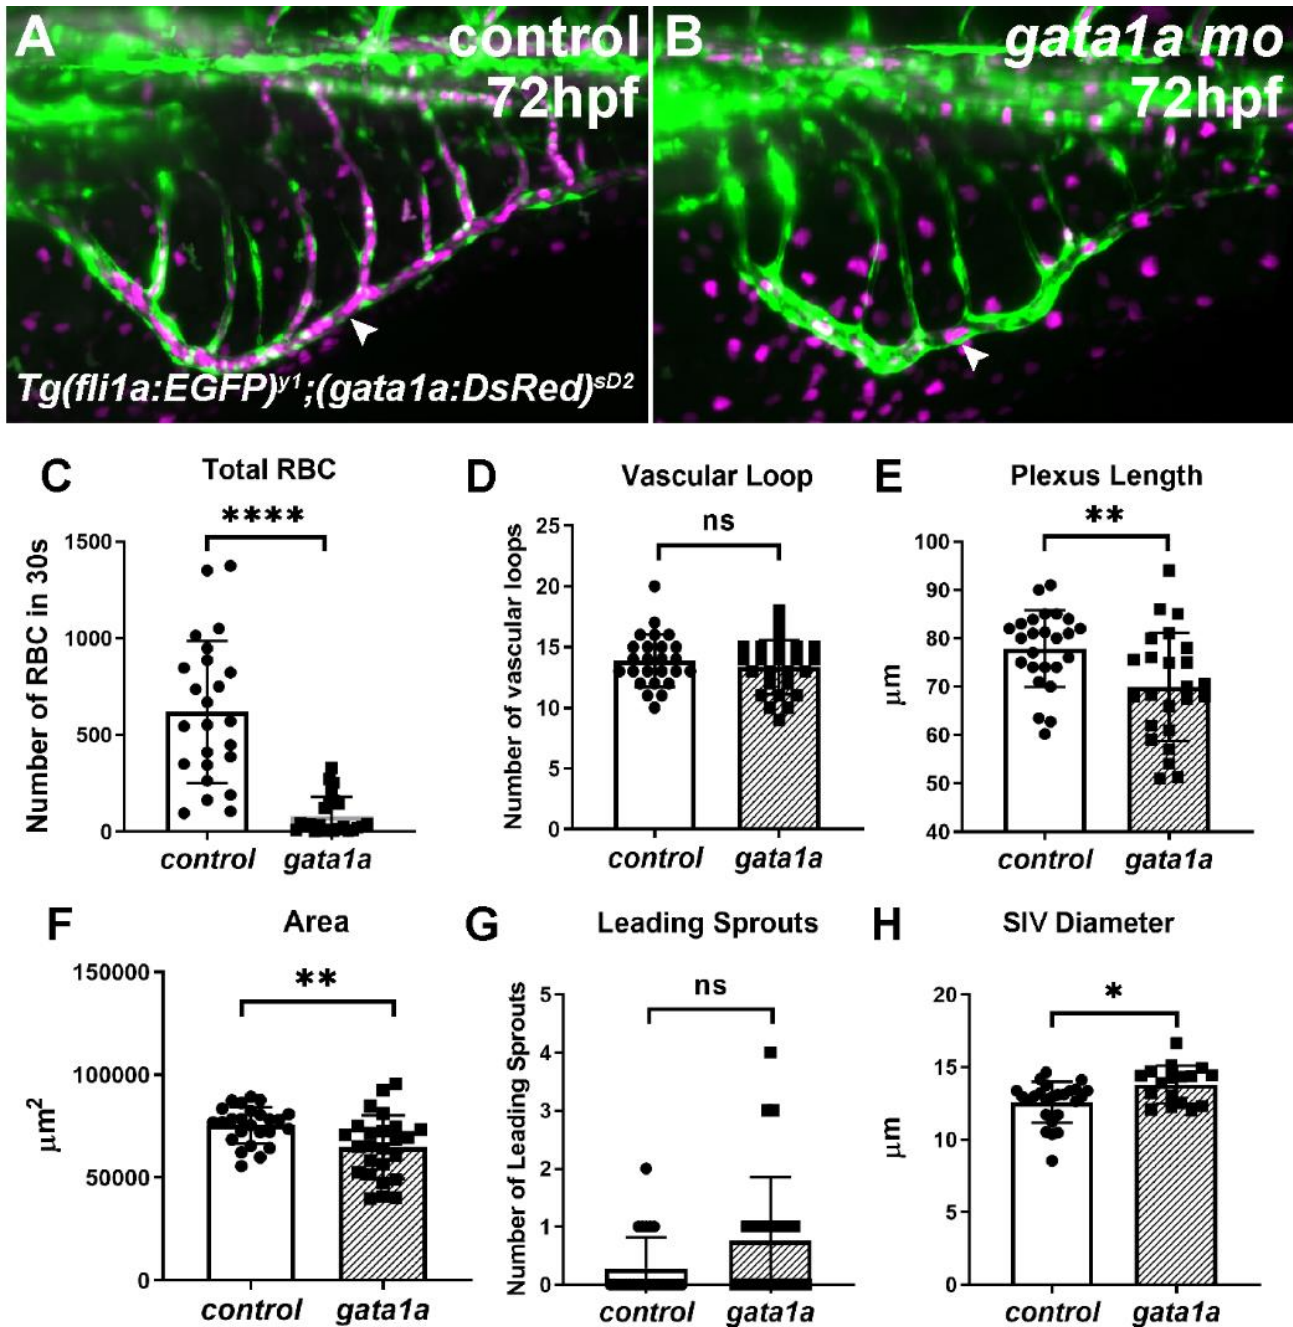

817

818

**Figure 6 Leading sprout regression occurs under conditions of reduced blood flow**

819 Leading sprouts undergo normal regression in *gata1a* morphants (A) in comparison to controls (B)

820 despite a substantial reduction of circulating erythrocytes in *gata1a* morphants (C). Frequency of

821 vascular loops did not differ between *gata1a* morphants and controls (D), but plexus length (E) and

822 area (F) was reduced in *gata1a* morphants. Frequency of leading sprouts was not significantly altered

823 in *gata1a* morphants (G), but SIVP diameter was increased in these embryos (H, arrowhead). Unpaired

824 *t*-test, \*\*\*\*  $p \leq 0.0001$ ; \*\*  $p \leq 0.01$ ; \*  $p < 0.05$ ; ns  $p \geq 0.05$ ; control morphants  $n=24$ , *gata1a* morphants

825  $n=24$ , 3 replicates.

826

827

828

829

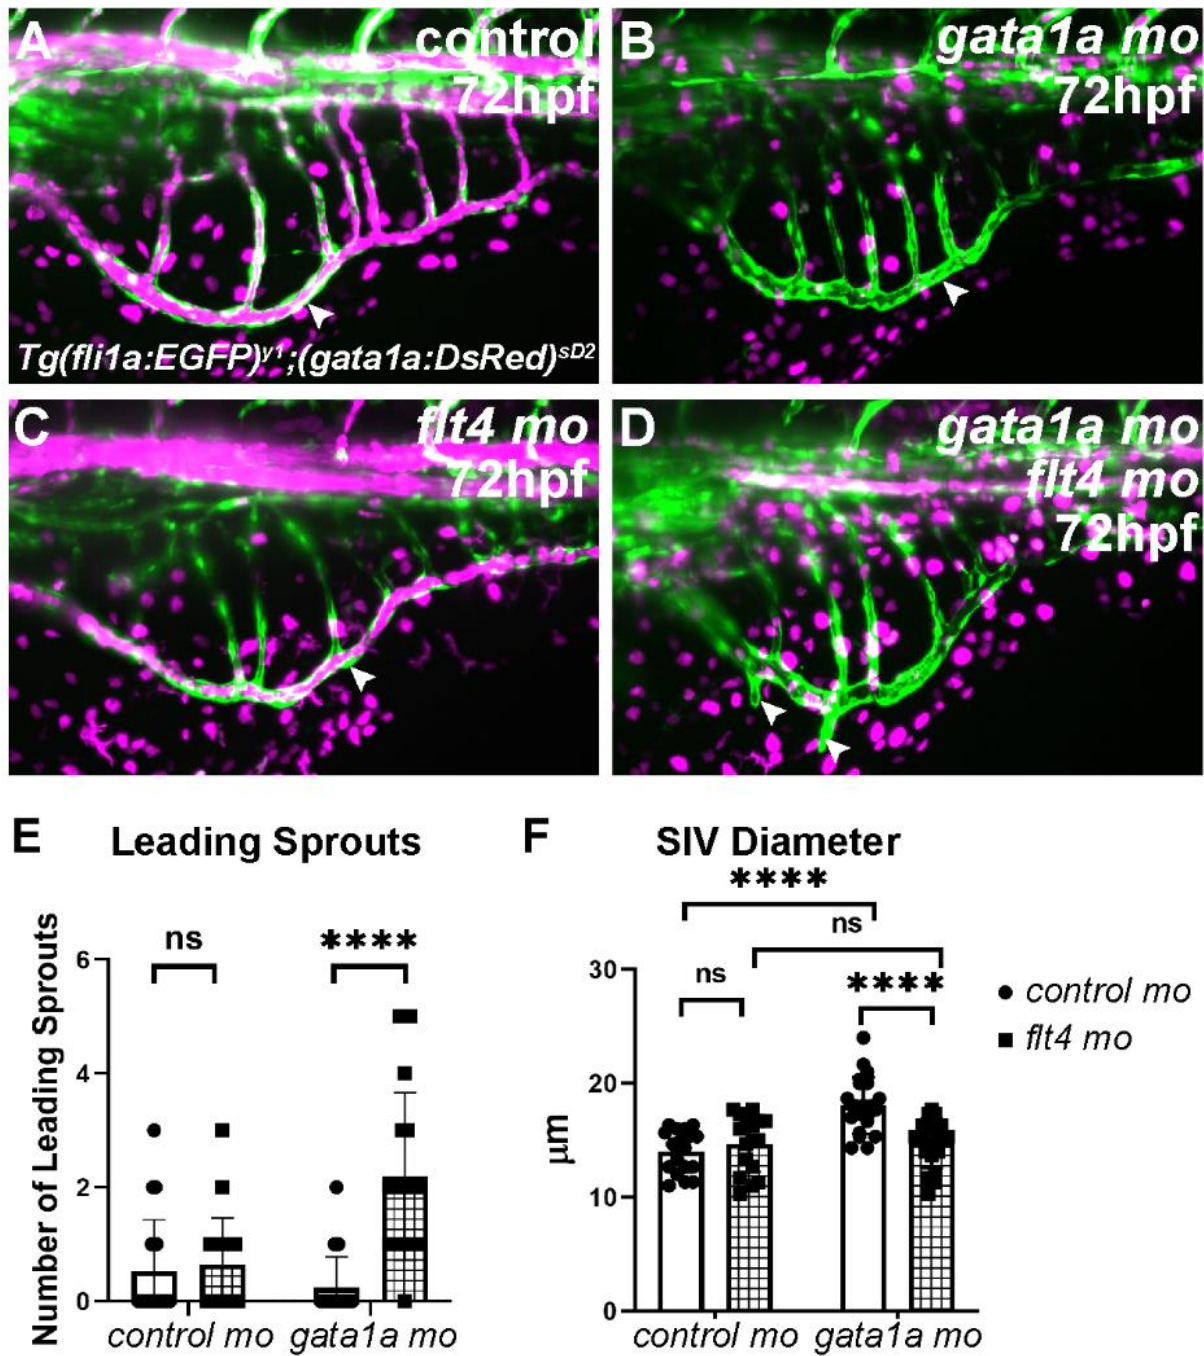

830

831

832 **Figure 7 Leading sprout regression under low blood flow conditions is dependent on *flt4***

833

834 In comparison to controls (A), *gata1a* morphants displayed reduced circulating erythrocytes within the

835

836 SIVP without inhibiting leading sprout regression (B, arrows). Leading sprout regression was unaltered

837

838 by *flt4* knockdown under normal flow conditions (C) but *flt4* knockdown inhibited sprout regression under

839

840 low flow conditions (D, arrows). The frequency of leading sprouts was significantly increased in

841

842 *flt4/gata1a* double morphants compared to either *flt4*, *gata1a* or control single morphants (E). SIV

843

844 diameter was enlarged under low flow conditions in *gata1a* morphants, but this was reduced following

845

846 *flt4* knockdown under low flow conditions (F). Two-way ANOVA, \*\*\*\*  $p \leq 0.0001$ ; \*\*\*  $p \leq 0.001$ ; \*\*  $p \leq$

847

848 0.01; ns  $p \geq 0.05$ . control morphants n=19; *flt4* morphants n=19; *gata1a* morphants n=21; *flt4; gata1a*

849

850 morphants n=21, 3 replicates.

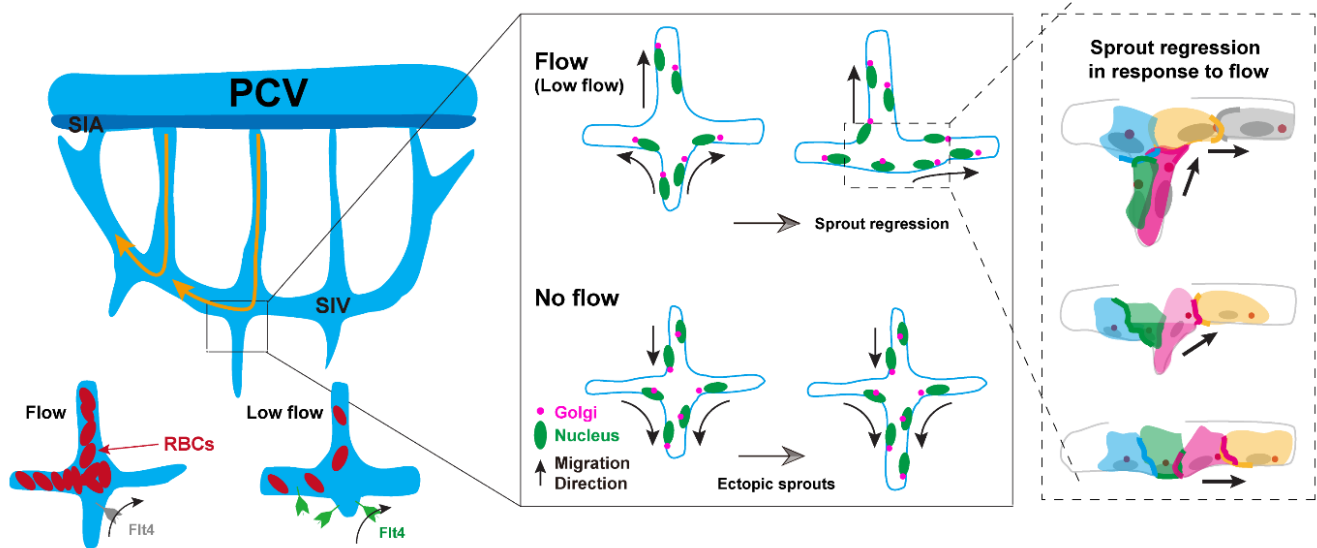

843

844

845

### Figure 8 Cellular mechanisms of flow-mediated sprout regression

846

Schematic illustrations depicting the cellular behaviours during SIVP sprout regression in the presence and absence of flow. Blood flow promotes EC Golgi polarisation, dorsal and lateral EC migration and leads to sprout regression via Flt4 under low blood flow conditions. Illustrations highlighted with dashed lines depict co-ordination of EC migration during sprout regression in response to flow. ECs (in grey and yellow) at the luminal surface migrate laterally against flow and ECs (in green and pink) in the regressing sprout are pulled or use their neighbouring cells as migratory substrates via EC junctions (thickened lines), followed by EC rearrangements which lead to sprout regression. Abbreviations; PCV posterior cardinal vein; RBCs, red blood cells; SIV; sub-intestinal vein; SIA, supra-intestinal artery

854

855

856

857

858
